# Supplementary material
Source: PubMed Central journal article supplement (PMC2846625)
Supplement: NIHMS185774-supplement-Supplement.pdf [file NIHMS185774-supplement-Supplement.pdf]

## Materials and Methods

### *Yeast strains*

pDEST-*PRK1KD* was generated from pDEST-*PRK1WT* (1) by mutating Asp176 to Ala by the QuikChange method using the following primers: PRK1KDUP: 5'-TGTATAAAGTTTGTGCTTTTGGTTCCGTTTC-3', PRK1KDDN: 5'-GAAACGGAACCAAAAGCACAACTTTATACA-3'. Sequence-confirmed pDEST-*PRK1KD* was then transformed into yeast strain Y258 using standard LiAc transformation methods (2).

*prk1Δ ark1Δ* strains were generated by first introducing a *prk1-Δ::KANMX6* deletion cassette by transformation using the available Bem2 and Ede1 chromosomally TAP-tagged strains (3). These *MATα prk1-Δ::KANMX6* strains were then mated to a *MATa ark1-Δ::URA3* strain that was obtained by rescuing haploids from the marker swapped *ark1-Δ::KANMX6* heterozygote diploid strain generated by the YKO consortium (pM4758) (4, 5). Following sporulation and tetrad dissection, *MATα prk1Δ::KANMX6 ark1Δ::URA3* haploids that still contained the TAP-tagged candidate substrate were identified by growth on synthetic complete media lacking uracil (SC-ura), rich media containing geneticin (YPAD + G418), and synthetic complete media lacking histidine (SC-his) and positive mating to the a mating type tester strain.

*vhs1Δ::KANMX6 Sol2-TAP::HIS3MX6* was generated by transformation using the available Sol2 chromosomally TAP-tagged strain.

44 of the kinases were purified from yeast using either the N-terminal GST-His<sub>6</sub>-tagged overexpression ORF collection (6) or the C-terminal TAP-tagged overexpression ORF collection (1). Yeast strains were first grown as starter cultures in 4 ml of SC-ura media, and then diluted into 400 ml of SC-ura/raffinose media and allowed to grow ~16 hr at 30°C to an OD<sub>600</sub> of 0.6-0.8. Fusion protein expression was induced by adding 200 ml of 3X YEP-Gal (3% yeast extract, 6% peptone, 6% galactose) for 6 hr. Cells were harvested by centrifugation, washed with ice-cold water, aliquoted into four tubes, and stored at -80°C.

### *Preparation of crude yeast extracts*

To prepare crude extracts for affinity purification, cell pellets were thawed on ice, and 500 μl of 0.5 mm acid washed glass beads (Biospec) was added to each tube. Two rounds of lysis were performed: once with lysis buffer (50 mM Tris-HCl, pH 7.5, 1 mM EGTA, 0.1% Triton X-100, 10% glycerol, 0.5 mM DTT, 1 mM PMSF, 1 mM NaF, 12.5 mM β-glycerophosphate, 1X Complete protease inhibitors [Roche]) containing 150 mM NaCl (LB150) and once with lysis buffer containing 650 mM NaCl (LB650). 500 μl of LB150 was added to each tube, and cells were lysed by shaking for 6 min in a paint-shaker (5G-HD, Harvil) at 4°C followed by centrifugation at 20,000 X g for 5 min. Supernatants were combined together in a single 15 ml conical tube. 500 μl of LB 650 was then added to each tube containing the remaining cell debris. Cells were subjected to another round of paint-shaking, and second round lysates were collected as described above and combined with the first round lysates.

### *Affinity purification of GST-His<sub>6</sub>-tagged kinases*

To affinity purify GST-His<sub>6</sub>-tagged kinases from yeast, crude extracts were mixed with 500  $\mu$ l of washed glutathione sepharose (GE Healthcare) resuspended in 4 ml of lysis buffer (without added NaCl) and incubated with agitation for 2 hr at 4°C. Beads were pelleted by centrifugation at 2,500 X g for 5 min and washed three times with 10 ml of cold wash buffer (50 mM Tris-HCl pH 7.5, 150 mM NaCl, 0.1% Triton X-100, 10% glycerol). Beads were washed an additional two times with kinase buffer without MgCl<sub>2</sub> (20 mM HEPES, pH 7.4, 150 mM NaCl, 0.1% Tween 20, 25% glycerol, 1 mM DTT), and bound kinase was recovered by two rounds of elution with 200  $\mu$ l of kinase buffer containing 30 mM reduced GSH (15 min, 4°C with agitation). Eluate was separated from beads by centrifugation through a 3  $\mu$ m polycarbonate filter plate (5 min at 1,900 X g). The eluted kinase was snap frozen and stored at -80°C.

#### *Affinity purification of TAP-tagged kinases*

To affinity purify TAP-tagged kinases from yeast, crude extracts were mixed with 500  $\mu$ l of washed IgG sepharose (GE Healthcare) resuspended in 4 ml of lysis buffer (without added NaCl) and incubated with agitation for 2 hr at 4°C. Beads were pelleted by centrifugation at 210 X g for 5 min and washed three times with 10 ml of cold wash buffer (above). Beads were washed an additional two times with kinase buffer without MgCl<sub>2</sub> (above). To elute bound kinase, beads resuspended in 400  $\mu$ l of kinase buffer were incubated with 15  $\mu$ l of GST-3C protease (expressed and purified as described (1)) on a nutator overnight at 4°C. Cleaved kinase was separated from beads by centrifugation through a 3  $\mu$ m polycarbonate filter plate as described above. GST-3C protease was removed by mixing the flow-through with 250  $\mu$ l of washed glutathione sepharose (1 hr, 4°C). Pure kinase was recovered by a second round of centrifugation through fresh wells of a filter plate. The purified kinase was snap frozen and stored at -80°C.

#### *Expression and purification of kinases from mammalian cells*

Coding sequences for Cak1, Cdc15 (residues 1 – 303), Gcn2 (residues 590 – 994), Prr1, Skm1 (residues 339 – 655), Vhs1, and Ykl171w (residues 436 – 913) were PCR amplified from yeast genomic DNA and ligated into the mammalian expression vector pEBG2, which produces proteins as N-terminal GST fusions. Kinases were expressed by transient transfection of HEK293T cells using Lipofectamine Plus (Invitrogen). Between 40 and 44 hr after the start of transfection, cells were washed with ice-cold PBS, and extracted into 293 lysis buffer (20 mM Tris, pH 7.5, 150 mM NaCl, 1 mM EDTA, 1 mM EGTA, 1% Triton X-100, 1 mM DTT, 1 mM PMSF, 2.5 mM sodium pyrophosphate, 1 mM  $\beta$ -glycerophosphate, 1 mM Na<sub>3</sub>VO<sub>4</sub>, 10  $\mu$ g/ml leupeptin, 2  $\mu$ g/ml pepstatin A, 10  $\mu$ g/ml aprotinin), 250  $\mu$ l per 6 cm plate. Lysates were cleared by centrifugation (10 min at 16,000 X g, 4°C), and incubated with glutathione sepharose (8  $\mu$ l per plate) for 2 hr at 4°C. Beads were pelleted and washed twice with 293 lysis buffer, twice with GSH wash buffer (50 mM HEPES, pH 7.4, 5 mM  $\beta$ -glycerophosphate, 2 mM DTT, 0.1 mM Na<sub>3</sub>VO<sub>4</sub>, 10 mM MgCl<sub>2</sub>), and then eluted with two rounds GSH wash buffer containing 20 mM reduced GSH and 10% glycerol (10  $\mu$ l per plate each round for 30 min on ice). Eluted kinases were snap frozen in aliquots and stored at -80°C.

### *Production of remaining kinases*

The following kinases were prepared in active form as described: Cdc28-Cln1 (7), Cdc7 (8), Fus3 (9), Hog1 (10), Ipl1-Sli15 (11), Mek1 (12), Pho85-Pcl1/Pcl2/Pho80 (13), Rad53 (14), and Rim15 (15).

Full length Kss1 coding sequence was cloned by PCR into the bacterial His<sub>6</sub> tag expression vector pET28. To produce active Kss1, BL21 *E. coli* were co-transformed with pET28-Kss1 and pGEX4T-Ste7EE, which produces a constitutively active mutant of Ste7 that has its two activation loop phosphorylation sites mutated to Glu. Phosphorylated Kss1 was expressed and purified as described for mammalian MAPKs (16).

Rck2 purified from yeast was activated by incubation with Hog1 (15 µg/ml) in 20 mM HEPES, pH 7.4, 10 mM MgCl<sub>2</sub>, 1 mM DTT, 1 mM ATP for 30 min at 30°C immediately prior to peptide screening. Residual Hog1 activity was blocked during assay of Rck2 by including 50 µM SB203580 in the reactions.

### *Characterization of yeast kinase preparations*

Purified kinases were analyzed by SDS-PAGE followed by Coomassie staining and immunoblotting against the GST or HA tag (anti-GST antibody, 1:1,000, Sigma or anti-HA16B12 antibody, 1:1,000, Covance) as appropriate. Kinase preparations deemed to be sufficiently pure (>90%) and of the correct fusion size were tested for kinase activity by radiolabel assay using a cocktail of myelin basic protein (MBP, Upstate) and histone H1 (Upstate) as substrates. Purified kinase (7 µl) was incubated for 1 hr at 30°C with 0.8 µg each of MBP and histone H1 in the presence of 100 µM ATP, 0.25 µCi γ-[<sup>33</sup>P]-ATP (Amersham), and 10 mM MgCl<sub>2</sub> in a total reaction volume of 10 µl. The reactions were stopped by adding 3X SDS-PAGE sample loading buffer (5 µl) followed by heating for 4 min at 95°C. Proteins were resolved by SDS-PAGE, and gels were dried and exposed to autoradiography film. Activity of each kinase preparation was assessed by analyzing the extent of both autophosphorylation and phosphorylation of the exogenous substrates as indicated by the amount of incorporated radiolabel.

### *Assay of individual peptide substrates*

Optimized peptide substrates and individual variants were synthesized using standard Fmoc chemistry and purified by reversed phase HPLC. Kinase assays were performed at 10 µM peptide concentration in kinase buffer with 50 µM γ-[<sup>33</sup>P]-ATP (1 µCi per 25 µl reaction) (10 - 15 min, 30°C). At 5 min time points, reactions were spotted onto P81 phosphocellulose membrane, which was washed extensively with 0.42% phosphoric acid, immersed briefly in acetone, and air-dried. Peptide phosphorylation signals were quantified by scintillation counting.

### *In vitro kinase assays of protein substrates*

Prk1 WT kinase, Prk1 KD kinase, and candidate substrates were purified from the C-terminal TAP-tagged overexpression ORF collection (1) on IgG sepharose beads as described above. Purified kinase (2.5 µl) was mixed with each purified candidate substrate (5 µl) and incubated for 1 hr at 30°C in the presence of 100 µM ATP, 0.25 µCi

$\gamma$ -[<sup>33</sup>P]-ATP (Amersham), and 10 mM MgCl<sub>2</sub>. The total volume of each reaction was 10  $\mu$ l. Reactions were stopped by adding 3X SDS-PAGE sample loading buffer (5  $\mu$ l) followed by heating for 4 min at 95°C. Proteins were fractionated by SDS-PAGE, and gels were dried and exposed to autoradiography film.

#### *Electrophoretic mobility shift analyses*

1.8 x 10<sup>7</sup> cells grown in YPAD to OD<sub>600</sub> of 0.6 were harvested by centrifugation and washed with ice-cold water. TAP-tagged Prk1/Ark1 substrates were purified on IgG sepharose from yeast cell lysates as described above, except that proteins were not eluted from the beads. Beads were washed twice with  $\lambda$  protein phosphatase ( $\lambda$ -PPase) reaction buffer [New England Biolabs (NEB)], and resuspended in the same buffer (30  $\mu$ l). Samples were phosphatase treated where indicated by incubating each sample with 1.5 units each of calf intestinal phosphatase (NEB), protein phosphatase 1 (NEB), and  $\lambda$ -PPase (NEB) for 30 min at 30°C. Substrates were eluted from the beads in 1X SDS loading buffer by heating for 4 min at 95°C and resolved by SDS-PAGE, followed by immunoblotting with anti-TAP antibody (Open Biosystems, 1:3000).

Electrophoretic mobility of Sol2 was determined from crude lysates. Cell pellets from WT Sol2-TAP and *vhs1* $\Delta$  Sol2-TAP strains were lysed directly in 250  $\mu$ l 1X SDS loading buffer (NEB) using the FastPrep®-24 System (6 m/s for 20 sec, MP Biomedicals) with 250  $\mu$ l of 0.5 mm acid washed glass beads (Biospec). The resulting crude extracts were heated for 4 min at 95°C and resolved on SDS-PAGE gels containing 25 mM Phos-tag (17) (NARD Institute, Ltd.) followed by immunoblotting with anti-TAP antibody as described above.

#### **Supplemental Datasets**

Dataset S1. Tab delimited files containing average PWMs for each of the 61 kinases assayed. PWM format follows spot array design where each row represents which position relative to the targeted phosphoacceptor site is fixed and each column represents which amino acid is fixed at that position. Spots intensities from the peptide arrays were quantified and normalized so that the total value within a single row (corresponding to a single position relative to the phosphorylation site), not including pThr and pTyr, was given a value of 20. Values greater than 1.0 thus represent positively selected residues, and values less than 1.0 are negatively selected.

Dataset S2. Tab delimited files containing MOTIPS output for each of the 61 kinases assayed. Phosphorylation sites in yeast proteins were ranked by match to the PWM and scored for predicted accessibility, probability that it falls in a disordered region, and sequence conservation across 13 yeast proteomes. An overall likelihood score is given that is the output of the Bayesian classifier of these four features. Separate columns in each file indicate whether the kinase and predicted substrate share a common GO cellular compartment, whether the substrate was identified through proteome chip screening by Ptacek, *et al.* (18), and whether a physical or genetic interaction has been reported (according to Biogrid). If the site appeared in a MS-based phosphoproteomic screen, the identified phosphopeptide is given.

Dataset S3. Clustal files containing multiple sequence alignments of every *S. cerevisiae* protein sequence with its orthologs from 12 other yeasts.

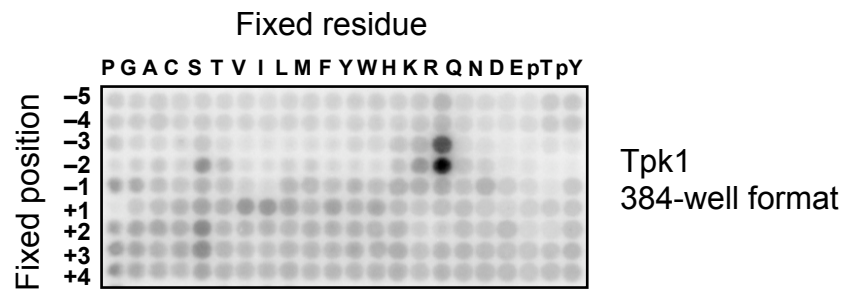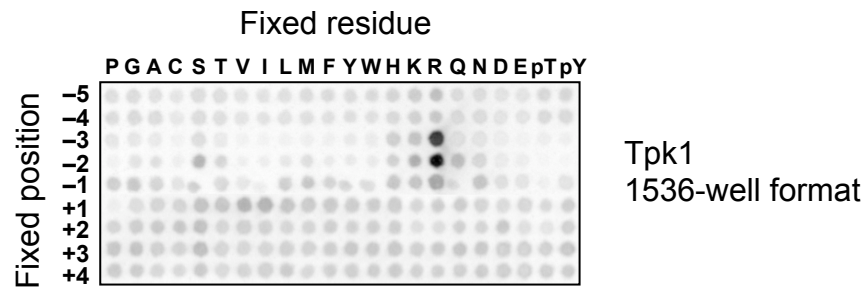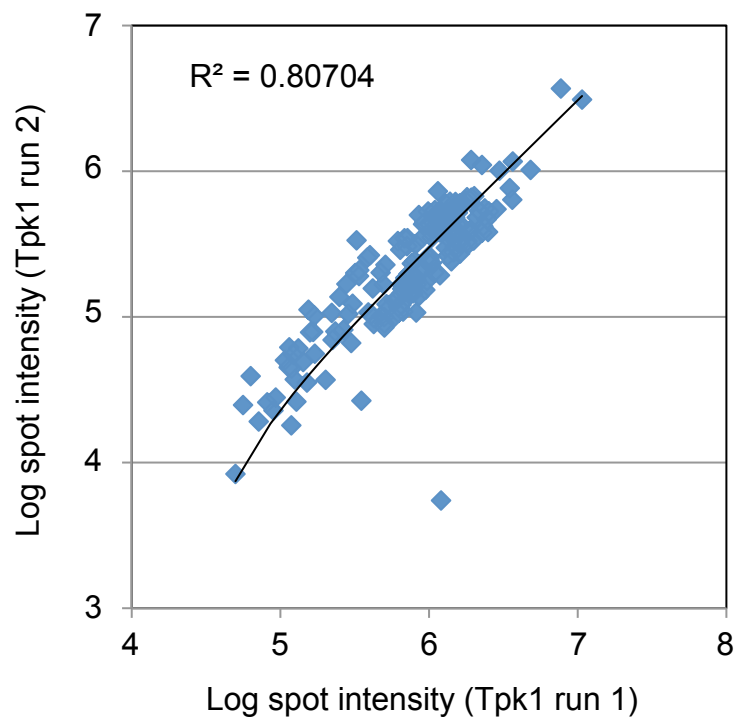

**Figure S1.** Assay reproducibility. Tpk1 was assayed using both the 384-well plate format originally reported and the miniaturized 1536-well format. The graph at bottom shows the correlation between spot intensities corresponding to each peptide for two runs with Tpk1 using the miniaturized 1536-well format.

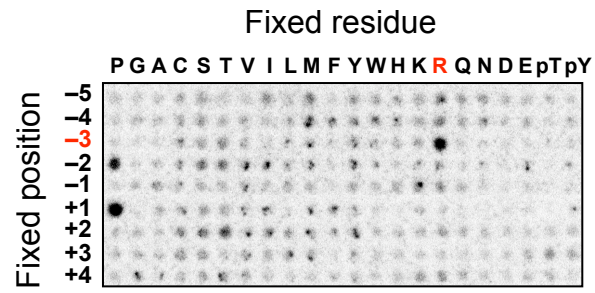

**Kss1 S147E**

**Figure S2.** Representative peptide array screening results for the Kss1 S147E mutant.

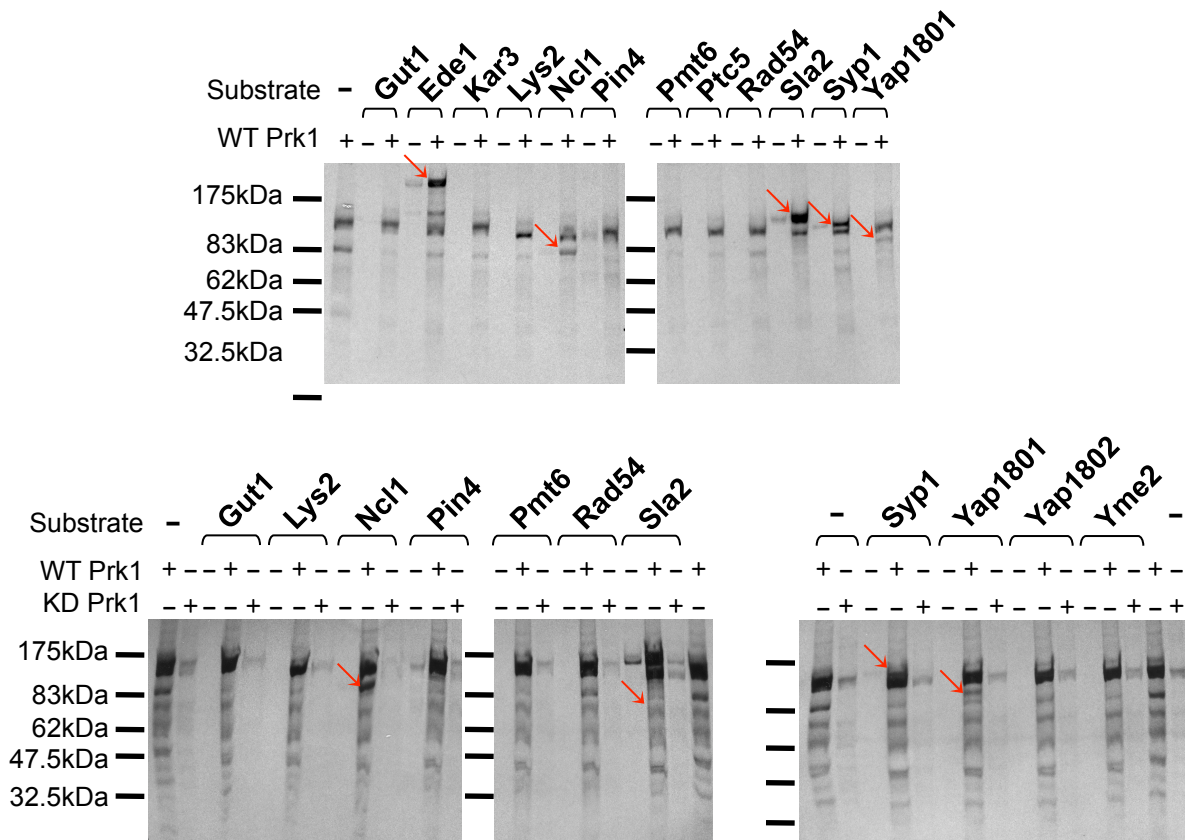

**Figure S3.** Representative Prk1 in vitro assays. Candidate substrates were purified and assayed in the presence of either wildtype Prk1 (WT Prk1) or a Prk1 kinase inactive mutant (KD Prk1, D176A), or in the absence of any kinase in 10  $\mu$ l reactions. Red arrows point to validated substrates.



**Table S1.** Representative peptide array screening results and sequence logos for each of the 61 kinases assayed. Hsl1 was assayed in the original 384-well format which lacked the zero position control mixtures, and thus no information regarding its selectivity for Ser or Thr residues as the targeted phosphoacceptor site was obtained.

| Gene Name    | ORF Name       | Array Image                                                                          |                                                                                       | Logo                                                                                  |
|--------------|----------------|--------------------------------------------------------------------------------------|---------------------------------------------------------------------------------------|---------------------------------------------------------------------------------------|
|              |                | PGAC ST V I L M F Y W H K R Q N D E p T p Y                                          | 0: - S T                                                                              |                                                                                       |
| <i>AKL1</i>  | <i>YBR059C</i> | 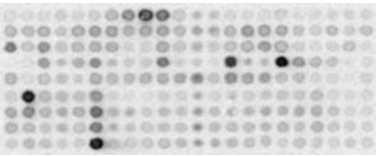   |    |    |
| <i>ARK1</i>  | <i>YNL020C</i> |    |    |    |
| <i>ATG1</i>  | <i>YGL180W</i> |    |    |    |
| <i>CAK1</i>  | <i>YFL029C</i> |   |  |   |
| <i>CDC15</i> | <i>YAR019C</i> |  |  |  |
| <i>CDC28</i> | <i>YBR160W</i> |  |  |  |
| <i>CDC5</i>  | <i>YMR001C</i> |  |  |  |
| <i>CDC7</i>  | <i>YDL017W</i> |  |  |  |

| Gene Name    | ORF Name       | Array Image |                                    | Logo |
|--------------|----------------|-------------|------------------------------------|------|
|              |                | PGAC        | STVI LMFYWHKRQNDE <sub>pT</sub> pY |      |
| <i>CKA1</i>  | <i>YIL035C</i> |             |                                    |      |
| <i>CLA4</i>  | <i>YNL298W</i> |             |                                    |      |
| <i>CMK1</i>  | <i>YFR014C</i> |             |                                    |      |
| <i>CMK2</i>  | <i>YOL016C</i> |             |                                    |      |
| <i>FMP48</i> | <i>YGR052W</i> |             |                                    |      |
| <i>FUS3</i>  | <i>YBL016W</i> |             |                                    |      |
| <i>GCN2</i>  | <i>YDR283C</i> |             |                                    |      |
| <i>GIN4</i>  | <i>YDR507C</i> |             |                                    |      |

| Gene Name    | ORF Name       | Array Image                                 |          | Logo |
|--------------|----------------|---------------------------------------------|----------|------|
|              |                | PGAC ST V I L M F Y W H K R Q N D E p T p Y | 0: - S T |      |
| <i>HOG1</i>  | <i>YLR113W</i> |                                             |          |      |
| <i>HRR25</i> | <i>YPL204W</i> |                                             |          |      |
| <i>HSL1</i>  | <i>YKL101W</i> |                                             |          |      |
| <i>IPL1</i>  | <i>YPL209C</i> |                                             |          |      |
| <i>KCC4</i>  | <i>YCL024W</i> |                                             |          |      |
| <i>KIN1</i>  | <i>YDR122W</i> |                                             |          |      |
| <i>KIN3</i>  | <i>YAR018C</i> |                                             |          |      |
| <i>KIN4</i>  | <i>YOR233W</i> |                                             |          |      |

| Gene Name         | ORF Name               | Array Image                      |          | Logo |
|-------------------|------------------------|----------------------------------|----------|------|
|                   |                        | PGAC ST V I L MFYWHKRQND E pT pY | 0: - S T |      |
| <i>KSP1</i>       | <i>YHR082C</i>         |                                  |          |      |
| <i>KSS1</i>       | <i>YGR040W</i>         |                                  |          |      |
| <i>MCK1</i>       | <i>YNL307C</i>         |                                  |          |      |
| <i>MEK1</i>       | <i>YOR351C</i>         |                                  |          |      |
| <i>MPS1</i>       | <i>YDL028C</i>         |                                  |          |      |
| <i>MRK1</i>       | <i>YDL079C</i>         |                                  |          |      |
| <i>PHO85-PCL1</i> | <i>YPL031C-YNL289W</i> |                                  |          |      |
| <i>PHO85-PCL2</i> | <i>YPL031C-YDL127W</i> |                                  |          |      |

| Gene Name          | ORF Name               | Array Image                                                                          |                                                                                       | Logo                                                                                  |
|--------------------|------------------------|--------------------------------------------------------------------------------------|---------------------------------------------------------------------------------------|---------------------------------------------------------------------------------------|
|                    |                        | PGAC ST V I L M F Y W H K R Q N D E p T p Y                                          | 0: - S T                                                                              |                                                                                       |
| <i>PHO85-PHO80</i> | <i>YPL031C-YOL001W</i> | 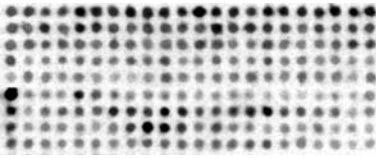   |    |    |
| <i>PKH2</i>        | <i>YOL100W</i>         |    |    |    |
| <i>PRK1</i>        | <i>YIL095W</i>         |    |    |    |
| <i>PRR1</i>        | <i>YKL116C</i>         |   |  |   |
| <i>PSK2</i>        | <i>YOL045W</i>         |  |  |  |
| <i>PTK2</i>        | <i>YJR059W</i>         |  |  |  |
| <i>RAD53</i>       | <i>YPL153C</i>         |  |  |  |
| <i>RCK2</i>        | <i>YLR248W</i>         |  |  |  |

| Gene Name    | ORF Name       | Array Image                  |         | Logo |
|--------------|----------------|------------------------------|---------|------|
|              |                | PGAC ST V I LMFYWHKRQNDEpTpY | 0:- S T |      |
| <i>RIM11</i> | <i>YMR139W</i> |                              |         |      |
| <i>RIM15</i> | <i>YFL033C</i> |                              |         |      |
| <i>SCH9</i>  | <i>YHR205W</i> |                              |         |      |
| <i>SKM1</i>  | <i>YOL113W</i> |                              |         |      |
| <i>SKY1</i>  | <i>YMR216C</i> |                              |         |      |
| <i>SLT2</i>  | <i>YHR030C</i> |                              |         |      |
| <i>SNF1</i>  | <i>YDR477W</i> |                              |         |      |
| <i>STE20</i> | <i>YHL007C</i> |                              |         |      |

| Gene Name   | ORF Name       | Array Image                                 |          | Logo |
|-------------|----------------|---------------------------------------------|----------|------|
|             |                | PGAC ST V I L M F Y W H K R Q N D E p T p Y | 0: - S T |      |
| <i>TOS3</i> | <i>YGL179C</i> |                                             |          |      |
| <i>TPK1</i> | <i>YJL164C</i> |                                             |          |      |
| <i>TPK2</i> | <i>YPL203W</i> |                                             |          |      |
| <i>TPK3</i> | <i>YKL166C</i> |                                             |          |      |
| <i>VHS1</i> | <i>YDR247W</i> |                                             |          |      |
| <i>YAK1</i> | <i>YJL141C</i> |                                             |          |      |
| <i>YCK1</i> | <i>YHR135C</i> |                                             |          |      |
| <i>YCK2</i> | <i>YNL154C</i> |                                             |          |      |



| Gene Name      | ORF Name       | Array Image                                 |          | Logo |
|----------------|----------------|---------------------------------------------|----------|------|
|                |                | PGAC ST V I L M F Y W H K R Q N D E p T p Y | 0: - S T |      |
| <i>YCK3</i>    | <i>YER123W</i> |                                             |          |      |
| <i>YDL025C</i> | <i>YDL025C</i> |                                             |          |      |
| <i>YKL171W</i> | <i>YKL171W</i> |                                             |          |      |
| <i>YNR047W</i> | <i>YNR047W</i> |                                             |          |      |
| <i>YPK1</i>    | <i>YKL126W</i> |                                             |          |      |
| <i>YPK2</i>    | <i>YMR104C</i> |                                             |          |      |
| <i>YPL141C</i> | <i>YPL141C</i> |                                             |          |      |

**Table S2.** Protein kinases analyzed in this study. Mammalian orthologs are indicated where known. References for reported phosphorylation motifs are listed where either the yeast kinase itself or the mammalian ortholog has been previously characterized.

| Kinase | ORF     | Category    | Ortholog        | Reported motif |
|--------|---------|-------------|-----------------|----------------|
| Akl1   | YBR059C | Other       | BiKE            | None           |
| Ark1   | YNL020C | Other       | BiKE            | None           |
| Atg1   | YGL180W | Other       | ULK2            | None           |
| Cak1   | YFL029C | Other       | None            | None           |
| Cdc15  | YAR019C | Other       | None            | (19)           |
| Cdc28  | YBR160W | Proline     | CDK2            | (20)           |
| Cdc5   | YMR001C | Acidophilic | PLK1            | (21)           |
| Cdc7   | YDL017W | Acidophilic | CDC7            | None           |
| Cka1   | YIL035C | Acidophilic | CK2             | (22)           |
| Cla4   | YNL298W | Basophilic  | PAK1            | (23)           |
| Cmk1   | YFR014C | Basophilic  | CAMK1           | (24)           |
| Cmk2   | YOL016C | Basophilic  | CAMK1           | (24)           |
| Fmp48  | YGR052W | Basophilic  | None            | None           |
| Fus3   | YBL016W | Proline     | ERK             | (22)           |
| Gcn2   | YDR283C | Acidophilic | GCN2            | None           |
| Gin4   | YDR507C | Basophilic  | BRSK1           | None           |
| Hog1   | YLR113W | Proline     | p38- $\alpha$   | (25)           |
| Hrr25  | YPL204W | Acidophilic | CK1- $\delta$   | (22)           |
| Hsl1   | YKL101W | Basophilic  | BRSK1           | None           |
| Ipl1   | YPL209C | Basophilic  | Aurora kinase C | (26)           |
| Kcc4   | YCL024W | Basophilic  | BRSK1           | None           |
| Kin1   | YDR122W | Other       | MARK2/Par1b     | None           |
| Kin3   | YAR018C | Other       | NEK2            | (27)           |
| Kin4   | YOR233W | Basophilic  | None            | None           |
| Ksp1   | YHR082C | Basophilic  | None            | None           |
| Kss1   | YGR040W | Proline     | ERK             | (22)           |
| Mck1   | YNL307C | Acidophilic | GSK3            | (28)           |
| Mek1   | YOR351C | Basophilic  | None            | None           |
| Mps1   | YDL028C | Acidophilic | TTK/MPS1        | None           |
| Mrk1   | YDL079C | Acidophilic | GSK3            | (28)           |
| Pho85  | YPL031C | Proline     | None            | None           |
| Pkh2   | YOL100W | Basophilic  | PDK1            | None           |
| Prk1   | YIL095W | Other       | AAK1            | None           |
| Prr1   | YKL116C | Basophilic  | None            | None           |
| Psk2   | YOL045W | Basophilic  | PASK            | None           |
| Ptk2   | YJR059W | Basophilic  | None            | None           |
| Rad53  | YPL153C | Basophilic  | None            | None           |
| Rck2   | YLR248W | Basophilic  | MK2             | (25)           |

Table S2, continued

|         |         |             |                 |       |
|---------|---------|-------------|-----------------|-------|
| Rim11   | YMR139W | Acidophilic | GSK3            | (28)  |
| Rim15   | YFL033C | Other       | None            | None  |
| Sch9    | YHR205W | Basophilic  | Akt/PKB         | (29)  |
| Skm1    | YOL113W | Basophilic  | PAK1            | (23)  |
| Sky1    | YMR216C | Basophilic  | SRPK2           | None  |
| Slt2    | YHR030C | Proline     | None            | None  |
| Snf1    | YDR477W | Basophilic  | AMPK            | (30)  |
| Ste20   | YHL007C | Basophilic  | PAK1            | (23)  |
| Tos3    | YGL179C | Other       | LKB1            | (31)* |
| Tpk1    | YJL164C | Basophilic  | PKA             | (20)  |
| Tpk2    | YPL203W | Basophilic  | PKA             | (20)  |
| Tpk3    | YKL166C | Basophilic  | PKA             | (20)  |
| Vhs1    | YDR247W | Basophilic  | None            | None  |
| Yak1    | YJL141C | Proline     | DYRK4           | (32)  |
| Yck1    | YHR135C | Acidophilic | CK1- $\gamma$ 2 | (22)  |
| Yck2    | YNL154C | Acidophilic | CK1- $\gamma$ 2 | (22)  |
| Yck3    | YER123W | Acidophilic | CK1- $\gamma$ 3 | (22)  |
| Ydi025c | YDL025C | Basophilic  | None            | None  |
| Ykl171w | YKL171W | Basophilic  | None            | None  |
| Ynr047w | YNR047W | Basophilic  | None            | None  |
| Ypk1    | YKL126W | Basophilic  | SGK2            | None  |
| Ypk2    | YMR104C | Basophilic  | SGK2            | None  |
| Ypl141c | YPL141C | Basophilic  | None            | None  |

\*Our observed motif for Tos3 differs from that reported for its human ortholog LKB1.

**Table S3.** Pairwise correlation coefficients for each of four genomic features and the Scansite match score. The PRK1 PWM was run on MOTIPS to obtain the top 2,000 predicted binding sites with values for all the five features: hits per protein, match score, disorder score, accessibility score, and conservation score. Multiple hits on a single open reading frame (ORF) were combined and the best set of scores was chosen, resulting in a list of 1,583 hits with no redundant protein targets. Pairwise Spearman correlation was then performed for all the features using the statistical software R.

|                     | Hits per ORF | Scansite score | Accessibility score | Disorder score | Conservation score |
|---------------------|--------------|----------------|---------------------|----------------|--------------------|
| Hits per ORF        | 1.00         | -0.25          | 0.06                | 0.17           | -0.02              |
| Scansite score      | -0.25        | 1.00           | -0.01               | -0.03          | -0.01              |
| Accessibility score | 0.06         | -0.01          | 1.00                | 0.57           | -0.42              |
| Disorder score      | 0.17         | -0.03          | 0.57                | 1.00           | -0.27              |
| Conservation score  | -0.02        | -0.01          | -0.42               | -0.27          | 1.00               |

**Table S4.** Alignment of yeast kinases analyzed in this study. Dataset S4 contains this alignment in clustal format.

|                    | 1       | 10     | 20      | 30                 | 40    | 50                                 |
|--------------------|---------|--------|---------|--------------------|-------|------------------------------------|
| TOS3_Scer/1-295    | FEILATL | GNGQY  | GKVKL   | ARDLGT             | ----- | GALVAIKILNR                        |
| TPK3_Scer/1-255    | FQILRTL | GTGSF  | GRVHL   | IRSNHN             | ----- | GRFYALKTLKKHTIVK                   |
| TPK1_Scer/1-255    | FQILRTL | GTGSF  | GRVHL   | IRSRHN             | ----- | GRYYAMKVLKKEIVVR                   |
| TPK2_Scer/1-255    | FQIMRTL | GTGSF  | GRVHL   | VRSVHN             | ----- | GRYYAIKVLKKQVVV                    |
| YPK1_Scer/1-256    | FDLLKVI | GKGSF  | GKVMQ   | VRKKDT             | ----- | QKVYALKAIRKSYIVS                   |
| YPK2_Scer/1-256    | FDLLKVI | GKGSF  | GKVMQ   | VRKKDT             | ----- | QKIYALKALRKAYIVS                   |
| SCH9_Scer/1-260    | FEVLRLL | GKGT   | FGQVY   | VQVKKDT            | ----- | QRIYAMKVLKSKVIVK                   |
| YNR047W_Scer/1-282 | FEKIRLL | GQGDV  | GKVFV   | VREKKT             | ----- | NRVYALKVLSKDEMIK                   |
| RIM15_Scer/1-269   | YDILKPI | SKGAY  | GSVYL   | ARKKLT             | ----- | GDYFAIKVLRKSDMIA                   |
| IPL1_Scer/1-252    | FELGKKL | GKGGK  | FGKVC   | VRHRST             | ----- | GYICALKVMKEEIIK                    |
| PKH2_Scer/1-265    | FKFGS   | IGDGAY | STVML   | ATSIDT             | ----- | KKRYAAKVLNKEYLIR                   |
| KCC4_Scer/1-265    | WKLGETL | GFGST  | GKVQL   | AQHERT             | ----- | GHRTAVKVISKSIFNN                   |
| GIN4_Scer/1-271    | WKLGETL | GLGST  | GKVQL   | ARNGST             | ----- | GQEAAVKVISKAVFNT                   |
| HSL1_Scer/1-289    | WKLGLT  | LGGSS  | GRVRL   | AKNMET             | ----- | GQLAAIKIVPKKAFV                    |
| SNF1_Scer/1-252    | YQIVKTL | GEGSF  | GKVKL   | AYHTTT             | ----- | GQKVALKIINKKVLAK                   |
| KIN1_Scer/1-279    | WEFVETV | GAGSM  | GKVKL   | LAKHRYT            | ----- | NEVCAVKIVNRATKAF                   |
| KIN4_Scer/1-268    | YIIGSTL | GEGEF  | GKVKL   | GWTKASSNE          | ----- | VPKQVAIKLIRRDTIKK                  |
| YPL141C_Scer/1-273 | YILGSTL | GEGEF  | GKVKL   | GWPKNFSNSNS        | ----- | TFDFPKQVAIKLIKRDISISN              |
| CMK1_Scer/1-263    | YVFGKTL | GAGTF  | GVVRA   | QAKNTET            | ----- | GEDVAVKILIKKALKG                   |
| CMK2_Scer/1-263    | YIFGRTL | GAGSF  | GVVRA   | QARKLST            | ----- | NEDVAIKILLKKALQG                   |
| RAD53_Scer/1-269   | SIIDEV  | VQGAF  | ATVKK   | AIERTT             | ----- | KTFAVKIIISKRVIG                    |
| RCK2_Scer/1-316    | YKLINKI | GEGAF  | SKVFRAI | PAKNSSNEFL         | ----- | TKNYKAVAIKVIKKADLSS                |
| APG1_Scer/1-302    | YTAEKI  | GKGSF  | ATVYR   | GHLTSDK            | ----- | SQHVAIKEVSRALKLN                   |
| MEK1_Scer/1-284    | EITNRIV | GNGT   | FGHVL   | LITHNSKERDEDEDVCYH | ----- | PENYAVKIIKLG----                   |
| YKL171W_Scer/1-283 | HRLGKI  | IGFGAW | GIIRE   | CFDIET             | ----- | GVGRVIKIVKFKGHQN                   |
| CDC5_Scer/1-256    | YHRGHFL | GEGGF  | ARCFQ   | -IKDSS             | ----- | GEIFAAKTVAKASIKS                   |
| PSK2_Scer/1-259    | FTILQVM | GEGAY  | GKVNLCI | HN                 | ----- | REHYIVVIKMIFKERILV                 |
| YDL025C_Scer/1-274 | GIPGRKL | GEGAS  | GSVSV   | VER                | ----- | TDGKLFACKMFRKPHLNN                 |
| KYL1_Scer/1-312    | YILVRKL | GWGHF  | STVWL   | LAKDMVNN           | ----- | THVAMKIVRGDKVYT                    |
| YAK1_Scer/1-257    | YLVLDI  | LQGGT  | FGQVVK  | QNLTK              | ----- | EILAVKVVKSRT EYL                   |
| PTK2_Scer/1-305    | DTDNKPI | GSGGS  | SEVRK   | VKSS               | ----- | YRQKDVYALKKLN--MIYH                |
| PHO85_Scer/1-291   | FKQLEKL | GNGT   | YATVY   | KLNKTT             | ----- | GVYVALKEVKL DSE--                  |
| CDC28_Scer/1-288   | YKRLEKV | GEGTY  | GVVYK   | ALDRPQG            | ----- | QRVVALKKIRLESED-                   |
| SLT2_Scer/1-296    | FQLIKEI | GHGAY  | IVCSA   | IFAEAAE            | ----- | DTTVAIKKVTNVFSKT                   |
| KSS1_Scer/1-301    | YKLVDLI | GEGAY  | GTVCS   | AIHKPS             | ----- | GIKVAIKKIQ-PFSKK                   |
| FUS3_Scer/1-297    | FQLKSL  | LGE    | GAYGV   | VCSATHKPT          | ----- | GEIVAIKKIE-PFDKP                   |
| HOG1_Scer/1-280    | YNDLNP  | VGMGA  | FGLVCS  | ATDTLT             | ----- | SQPVAIKKIMKPFSTA                   |
| RIM11_Scer/1-284   | FPTTEV  | VGHGS  | FGVVF   | ATVIQET            | ----- | EKVAIKKVLQDRFKF                    |
| MRK1_Scer/1-284    | YPTTEV  | VGHGS  | FGVVT   | TVIIET             | ----- | NQKVAIKKVLQDRRYK                   |
| MCK1_Scer/1-293    | VKEYRKI | GRGAF  | TVYQ    | AYLTQDKKNWL        | ----- | GPFAIKKVPAHTEYK                    |
| CKA1_Scer/1-324    | YEIENKV | GRGKY  | SEVFQ   | GVKGLDS            | ----- | KVKIVIKMLKPVK KKK                  |
| CDC7_Scer/1-272    | YKLIDKI | GEGTF  | SSVYK   | AKDITGKITKFFASHFW  | ----- | NYGSNYVALKKIYVTS SPO               |
| YCK1_Scer/1-261    | YKIGKKI | GEGSF  | GVLF    | EGTNMIN            | ----- | GVPVAIKFEPKTEAP                    |
| YCK2_Scer/1-261    | YKIGKKI | GEGSF  | GVLF    | EGTNMIN            | ----- | GLPVAIKFEPKTEAP                    |
| YCK3_Scer/1-296    | YAVGPKI | GEGSF  | GVIF    | EGENILHSCQ         | ---   | AQTGSKRDSSII MANEPVAIKFEPHSDAP     |
| HRR25_Scer/1-259   | FRIGRKI | GSGS   | FGDIY   | HGTNLIS            | ----- | GEEVAIKLESIRSRHP                   |
| PRR1_Scer/1-317    | WKKVRPI | GSGNF  | STVLL   | YELMDQSN           | ----- | PKLKQVAVKRLKYPEELS                 |
| MPS1_Scer/1-277    | YEKIELL | GRGG   | SSRVY   | KVKGSGN            | ----- | RVYALKRVSFDAFDD                    |
| GCN2_Scer/1-268    | FEEIAVL | GQGA   | FGQV    | VKARNALD           | ----- | SRYVAIKKIRHTEEK-                   |
| KIN3_Scer/1-319    | YQVLEEI | GRGS   | FGSVR   | KVIHIPT            | ----- | KKLLVRKDIKYGHMNS                   |
| PRK1_Scer/1-277    | AKIIKYL | TSGG   | FAQV    | YTA                | ----- | EISPPDPYSNANIACLKRVIVPHKQG         |
| ARK1_Scer/1-277    | VEIIKYL | TSGG   | FAQV    | YSA                | ----- | LINPPDPHSNSVACLKRVIVPDKPS          |
| AKL1_Scer/1-285    | VEVVNYL | AE     | GGFAQI  | YVVKFL             | ----- | EYLN EF-DNTASVPLKIGDVAQLKRVLVQDENG |
| VHS1_Scer/1-321    | YLITSQI | GEGAY  | GLVYR   | ALDIRTD            | ----- | ROYAIKAVVQSYGVS                    |
| SKM1_Scer/1-280    | FQLVEK  | AGQGAS | GA      | YLSKRIKLP          | --    | QENDPRF-LKSHCHR-VVGERVAIKQIRLSEQPK |
| CLA4_Scer/1-280    | FKVIEK  | AGQGAS | GSVYLA  | ERTHIP             | --    | TESNMIELINNDIDEPHVGDKVAIKQMVLSKQPR |
| STE20_Scer/1-252   | YANLVK  | IGQ    | ASGGV   | YAYEIGT            | ----- | NVSVAIKQMNLEKQPK                   |
| CDC15_Scer/1-248   | YHLKQVI | GRGSY  | GVVYK   | AINKHT             | ----- | DQVVVAIKEVYKND EEE                 |
| FMP48_Scer/1-285   | YTKLRSI | QSGTF  | STVYK   | AWSTTHN            | ----- | RYVALKITPKYK TSE                   |
| KSP1_Scer/1-260    | YQKIEDI | SEGSY  | GVYSL   | AKDVREK            | ----- | RLVAVKYIFKLE DLE                   |
| CAK1_Scer/1-304    | -MKLDS  | IDITHC | QLVK    | STRTARIYR          | ----- | SDTYAIKCLALDFDIP                   |

Table S4, continued

|                    | 61                                                          | 70    | 80    | 90    | 100        | 110                        |
|--------------------|-------------------------------------------------------------|-------|-------|-------|------------|----------------------------|
| TOS3_Scer/1-295    | -----                                                       | ----- | ----- | ----- | FEKRSG---- | YSLQLKV-ENPRVNQEIIE        |
| TPK3_Scer/1-255    | -----                                                       | ----- | ----- | ----- | -----      | -----LKQVEHTNDERR          |
| TPK1_Scer/1-255    | -----                                                       | ----- | ----- | ----- | -----      | -----LKQVEHTNDERL          |
| TPK2_Scer/1-255    | -----                                                       | ----- | ----- | ----- | -----      | -----MKQVEHTNDERR          |
| YPK1_Scer/1-256    | -----                                                       | ----- | ----- | ----- | -----      | -----KSEVTHTLAERT          |
| YPK2_Scer/1-256    | -----                                                       | ----- | ----- | ----- | -----      | -----KCEVTHTLAERT          |
| SCH9_Scer/1-260    | -----                                                       | ----- | ----- | ----- | -----      | -----KNEIAHTIGERN          |
| YNR047W_Scer/1-282 | -----                                                       | ----- | ----- | ----- | -----      | -----RNKIKRVLTEQE          |
| RIM15_Scer/1-269   | -----                                                       | ----- | ----- | ----- | -----      | -----KNQVTNVKSERA          |
| IPL1_Scer/1-252    | -----                                                       | ----- | ----- | ----- | -----      | -----YNLQKQFRREVE          |
| PKH2_Scer/1-265    | -----                                                       | ----- | ----- | ----- | -----      | -----QKKVKYVSIKKT          |
| KCC4_Scer/1-265    | NGN-----                                                    | ----- | ----- | ----- | -----      | -----HSNDDSVLPYNIEREIV     |
| GIN4_Scer/1-271    | GNVSGTSTI-----                                              | ----- | ----- | ----- | -----      | -----VGSTTPDALPYGIEREII    |
| HSL1_Scer/1-289    | HCSNNGTVPNSYSSSMVTSNVSSPSIA-----                            | ----- | ----- | ----- | -----      | -----SREHSNHSQTNPYGIEREIV  |
| SNF1_Scer/1-252    | SDMQG-----                                                  | ----- | ----- | ----- | -----      | -----RIEREIS               |
| KIN1_Scer/1-279    | LHKEQMLPPPKNQDVLER-----                                     | ----- | ----- | ----- | -----      | -----QKKLEKEISRDKRTIREAS   |
| KIN4_Scer/1-268    | D-----                                                      | ----- | ----- | ----- | -----      | -----ADKEIKIYREIN          |
| YPL141C_Scer/1-273 | D-----                                                      | ----- | ----- | ----- | -----      | -----YRKEVKIYREIN          |
| CMK1_Scer/1-263    | NKVQL-----                                                  | ----- | ----- | ----- | -----      | -----EALYDELD              |
| CMK2_Scer/1-263    | NNVQL-----                                                  | ----- | ----- | ----- | -----      | -----QMLYEELS              |
| RAD53_Scer/1-269   | N-----                                                      | ----- | ----- | ----- | -----      | -----MDGVTRERE             |
| RCK2_Scer/1-316    | INGDHRKKDK-----                                             | ----- | ----- | ----- | -----      | -----GKDSTKTSSRDQVLKEVA    |
| APG1_Scer/1-302    | KKLL-----                                                   | ----- | ----- | ----- | -----      | -----ENLEIEIA              |
| MEK1_Scer/1-284    | -----                                                       | ----- | ----- | ----- | -----      | -----PNKFDKEAR             |
| YKL171W_Scer/1-283 | -----                                                       | ----- | ----- | ----- | -----      | -----IKKHVLEVA             |
| CDC5_Scer/1-256    | EKTR-----                                                   | ----- | ----- | ----- | -----      | -----KKLLSEIQ              |
| PSK2_Scer/1-259    | DT-----                                                     | ----- | ----- | ----- | -----      | -----WVRDRKLGITIPSEIQ      |
| YDL025C_Scer/1-274 | EGTN-----                                                   | ----- | ----- | ----- | -----      | -----QSQLANYSKKVTTEFC      |
| SKY1_Scer/1-312    | -----                                                       | ----- | ----- | ----- | -----      | -----EAAEDEIK              |
| YAK1_Scer/1-257    | -----                                                       | ----- | ----- | ----- | -----      | -----TQSITTEAK             |
| PTK2_Scer/1-305    | E-----                                                      | ----- | ----- | ----- | -----      | -----SPEKFKRCSKEFI         |
| PHO85_Scer/1-291   | -----                                                       | ----- | ----- | ----- | -----      | -----EGTPSTAIRESIS         |
| CDC28_Scer/1-288   | -----                                                       | ----- | ----- | ----- | -----      | -----EGVPSTAIRESIS         |
| SLT2_Scer/1-296    | -----                                                       | ----- | ----- | ----- | -----      | -----LLCKRSLRELK           |
| KSS1_Scer/1-301    | -----                                                       | ----- | ----- | ----- | -----      | -----LFVTRTIREIK           |
| FUS3_Scer/1-297    | -----                                                       | ----- | ----- | ----- | -----      | -----LFALRTLREIK           |
| HOG1_Scer/1-280    | -----                                                       | ----- | ----- | ----- | -----      | -----VLAKRTYRELK           |
| RIM11_Scer/1-284   | -----                                                       | ----- | ----- | ----- | -----      | -----NRELE                 |
| MRK1_Scer/1-284    | -----                                                       | ----- | ----- | ----- | -----      | -----NRELE                 |
| MCK1_Scer/1-293    | -----                                                       | ----- | ----- | ----- | -----      | -----SRELQ                 |
| CKA1_Scer/1-324    | -----                                                       | ----- | ----- | ----- | -----      | -----IKREIK                |
| CDC7_Scer/1-272    | -----                                                       | ----- | ----- | ----- | -----      | -----RIYNELN               |
| YCK1_Scer/1-261    | -----                                                       | ----- | ----- | ----- | -----      | -----QLRDEYK               |
| YCK2_Scer/1-261    | -----                                                       | ----- | ----- | ----- | -----      | -----QLKDEYR               |
| YCK3_Scer/1-296    | -----                                                       | ----- | ----- | ----- | -----      | -----QLRDEFR               |
| HRR25_Scer/1-259   | -----                                                       | ----- | ----- | ----- | -----      | -----QLDYESR               |
| PRR1_Scer/1-317    | NVEQIN-----                                                 | ----- | ----- | ----- | -----      | -----TSLRYKETLSRLENLSTRELO |
| MPS1_Scer/1-277    | S-----                                                      | ----- | ----- | ----- | -----      | -----SIDGFKGEIE            |
| GCN2_Scer/1-268    | -----                                                       | ----- | ----- | ----- | -----      | -----LSTILSEVM             |
| KIN3_Scer/1-319    | KE-----                                                     | ----- | ----- | ----- | -----      | -----RQQLIAECS             |
| PRK1_Scer/1-277    | -----                                                       | ----- | ----- | ----- | -----      | -----LNTLRAEVD             |
| ARK1_Scer/1-277    | -----                                                       | ----- | ----- | ----- | -----      | -----LNTLRAEVD             |
| AKL1_Scer/1-285    | -----                                                       | ----- | ----- | ----- | -----      | -----LNEMRNEVE             |
| VHS1_Scer/1-321    | KEADMGNDKIHKNSVKLQKKLAKLKFESKNVVRVPSIDLESINMSEEDFKKLPHYKEIS | ----- | ----- | ----- | -----      | -----KQLIMNELL             |
| SKM1_Scer/1-280    | -----                                                       | ----- | ----- | ----- | -----      | -----KELIVNEIL             |
| CLA4_Scer/1-280    | -----                                                       | ----- | ----- | ----- | -----      | -----KELINEIL              |
| STE20_Scer/1-252   | -----                                                       | ----- | ----- | ----- | -----      | -----LNDIMAEIS             |
| CDC15_Scer/1-248   | -----                                                       | ----- | ----- | ----- | -----      | -----ANMKNEYD              |
| FMP48_Scer/1-285   | -----                                                       | ----- | ----- | ----- | -----      | -----AMYEVD                |
| KSP1_Scer/1-260    | -----                                                       | ----- | ----- | ----- | -----      | -----PHNAKFEVS             |
| CAK1_Scer/1-304    | -----                                                       | ----- | ----- | ----- | -----      | -----                      |

Table S4, continued

|                    | 121                                                        | 130 | 140 | 150 | 160 | 170                    |
|--------------------|------------------------------------------------------------|-----|-----|-----|-----|------------------------|
| TOS3_Scer/1-295    | VM-----                                                    |     |     |     |     | KRCHHENVVELYEILNDPE    |
| TPK3_Scer/1-255    | MLSIVS-----                                                |     |     |     |     | HPFIIRMWGTFO---        |
| TPK1_Scer/1-255    | MLSIVT-----                                                |     |     |     |     | HPFIIRMWGTFO---        |
| TPK2_Scer/1-255    | MLKLVE-----                                                |     |     |     |     | HPFLIRMWGTFO---        |
| YPK1_Scer/1-256    | VLARVD-----                                                |     |     |     |     | CPFIVPLKFSFO---        |
| YPK2_Scer/1-256    | VLARVD-----                                                |     |     |     |     | CPFIVPLKFSFO---        |
| SCH9_Scer/1-260    | ILVTTASKS-----                                             |     |     |     |     | SPFIVGLKFSFO---        |
| YNR047W_Scer/1-282 | ILATSN-----                                                |     |     |     |     | HPFIVTLYHSFO---        |
| RIM15_Scer/1-269   | IMMVQSD-----                                               |     |     |     |     | KPYVARLFASFQ---        |
| IPL1_Scer/1-252    | IQTSLN-----                                                |     |     |     |     | HPNLTKSYGYFH---        |
| PKH2_Scer/1-265    | ALQKLNNS-----                                              |     |     |     |     | PSVVRLFSTFO---         |
| KCC4_Scer/1-265    | IMKLLS-----                                                |     |     |     |     | HPNVLSLYDVWE---        |
| GIN4_Scer/1-271    | IMKLLN-----                                                |     |     |     |     | HPNVLRLYDVWE---        |
| HSL1_Scer/1-289    | IMKLIS-----                                                |     |     |     |     | HTNVMALFEVWE---        |
| SNF1_Scer/1-252    | YLRLLR-----                                                |     |     |     |     | HPHIKLYDVIK---         |
| KIN1_Scer/1-279    | LGQILY-----                                                |     |     |     |     | HPHICRLFEMCT---        |
| KIN4_Scer/1-268    | ALKHLT-----                                                |     |     |     |     | HPNIIYLEEVLQ---        |
| YPL141C_Scer/1-273 | ALKHLS-----                                                |     |     |     |     | HPNIVKLEEVLQ---        |
| CMK1_Scer/1-263    | ILQRLH-----                                                |     |     |     |     | HPNIVAFKDWFE---        |
| CMK2_Scer/1-263    | ILQKLS-----                                                |     |     |     |     | HPNIVSFKDWFE---        |
| RAD53_Scer/1-269   | VLQKLN-----                                                |     |     |     |     | HPRIVRLKGFYE---        |
| RCK2_Scer/1-316    | LHKTVSAG-----                                              |     |     |     |     | CSQIVAFIDFQE---        |
| APG1_Scer/1-302    | ILKKIK-----                                                |     |     |     |     | HPHIVGLIDCER---        |
| MEK1_Scer/1-284    | ILLRLD-----                                                |     |     |     |     | HPNIIKVYHTFCD--        |
| YKL171W_Scer/1-283 | IWRTLK-----                                                |     |     |     |     | HNRILPLLDWKLLDN        |
| CDC5_Scer/1-256    | IHKSMS-----                                                |     |     |     |     | HPNIVQFIDCFE---        |
| PSK2_Scer/1-259    | IMATLNKN-----                                              |     |     |     |     | SQENILKLLDFEDDD        |
| YDL025C_Scer/1-274 | IGSTLH-----                                                |     |     |     |     | HENIVETLDMLTEG-        |
| SKY1_Scer/1-312    | LLQRVNDADN-----                                            |     |     |     |     | TKEDSMGANHILKLLDHFNHKG |
| YAK1_Scer/1-257    | ILELLNOK-----                                              |     |     |     |     | IDPTNKHFFLRMYDSFV      |
| PTK2_Scer/1-305    | IAKHLSHN-----                                              |     |     |     |     | VHITNTFYLLKVPPTTY      |
| PHO85_Scer/1-291   | LMKELK-----                                                |     |     |     |     | HENIVRLYDVIHTEN        |
| CDC28_Scer/1-288   | LLKELK-----                                                |     |     |     |     | DDNIVRLYDIVHSDA        |
| SLT2_Scer/1-296    | LLRHFR-----                                                |     |     |     |     | GHKNITCLYDMDIVFY       |
| KSS1_Scer/1-301    | LLRYFH-----                                                |     |     |     |     | EHENIISILDKVRPVS       |
| FUS3_Scer/1-297    | ILKHFK-----                                                |     |     |     |     | HENIITIFNIQRPDS        |
| HOG1_Scer/1-280    | LLKHLR-----                                                |     |     |     |     | HENLICLQDIFLS--        |
| RIM11_Scer/1-284   | IMKMLS-----                                                |     |     |     |     | HINIIDLKYFFY---        |
| MRK1_Scer/1-284    | TMKMLC-----                                                |     |     |     |     | HPNTVGLQYFFY---        |
| MCK1_Scer/1-293    | ILRIAD-----                                                |     |     |     |     | HPNIVKLQYFFT--HL       |
| CKA1_Scer/1-324    | ILTDLSEKVPPTTLPFQKDQYYTNQKEDVLFIRPYIFDQPHNGHANIHLFDI IKDPI |     |     |     |     |                        |
| CDC7_Scer/1-272    | LLYIMT-----                                                |     |     |     |     | GSSRVAPLCAKRRVR-       |
| YCK1_Scer/1-261    | TYKIL-----                                                 |     |     |     |     | NGTPNIPYAYYFGQEG       |
| YCK2_Scer/1-261    | TYKIL-----                                                 |     |     |     |     | AGTPGIPQEYFGQEG        |
| YCK3_Scer/1-296    | AYRIL-----                                                 |     |     |     |     | NGCVGIPHAYYFGQEG       |
| HRR25_Scer/1-259   | VYRYL-----                                                 |     |     |     |     | SGGVGIPFIRWFGREG       |
| PRR1_Scer/1-317    | VLKSLN-----                                                |     |     |     |     | HPCIVKLLGINNPIF        |
| MPS1_Scer/1-277    | LLEKLK-----                                                |     |     |     |     | DQKRVIQLLDYEMGDG       |
| GCN2_Scer/1-268    | LLASLN-----                                                |     |     |     |     | HQYVVRYAAWLEED         |
| KIN3_Scer/1-319    | ILSQL-----                                                 |     |     |     |     | KHENIVEFYNWDFDEQ       |
| PRK1_Scer/1-277    | AMKLLRNN-----                                              |     |     |     |     | KHVVSYIDSHAARS         |
| ARK1_Scer/1-277    | AMRLKNN-----                                               |     |     |     |     | RYVVSYIDSHAACA         |
| AKL1_Scer/1-285    | VMKCLKGA-----                                              |     |     |     |     | PNIVQYFDSNASRR         |
| VHS1_Scer/1-321    | LHLRVHH-----                                               |     |     |     |     | HKNIVTIEVLQS--         |
| SKM1_Scer/1-280    | VMNDS-----                                                 |     |     |     |     | ROENIVNFLEAYIDD        |
| CLA4_Scer/1-280    | VMKDS-----                                                 |     |     |     |     | RHKNIVNFLEAYLRTD       |
| STE20_Scer/1-252   | VMKGS-----                                                 |     |     |     |     | KHPNIVNFIDSYVLKG       |
| CDC15_Scer/1-248   | LLKNL-----                                                 |     |     |     |     | NHN-NIVKYHGFIKRS       |
| FMP48_Scer/1-285   | VMKILSSCN-----                                             |     |     |     |     | PHPNICSMDFYTDSD        |
| KSP1_Scer/1-260    | IQTKIG-----                                                |     |     |     |     | RHQNIAALLDFFDSD--      |
| CAK1_Scer/1-304    | ILNKLGN-----                                               |     |     |     |     | KCKHILPLLESKATDN       |

Table S4, continued

|                    | 181                                            | 190 | 200                                 | 210 | 220 | 230            |
|--------------------|------------------------------------------------|-----|-------------------------------------|-----|-----|----------------|
| TOS3_Scer/1-295    | S-----                                         |     | TKVYLVLEYCSRGPVKWCPENK-----         |     |     | MEI            |
| TPK3_Scer/1-255    | -----                                          |     | DSQOVFMVMDYIEGGELFSLLRK-----        |     |     |                |
| TPK1_Scer/1-255    | -----                                          |     | DAQQIFMIMDYIEGGELFSLLRK-----        |     |     |                |
| TPK2_Scer/1-255    | -----                                          |     | DARNIFMVM DYIEGGELFSLLRK-----       |     |     |                |
| YPK1_Scer/1-256    | -----                                          |     | SPEKLYFVLAFINGGELFYHLQK-----        |     |     |                |
| YPK2_Scer/1-256    | -----                                          |     | SPEKLYLVLAFINGGELFYHLQH-----        |     |     |                |
| SCH9_Scer/1-260    | -----                                          |     | TPTDLYLVTDYMSGGELFWHLQK-----        |     |     |                |
| YNR047W_Scer/1-282 | -----                                          |     | SEDYLYLCMEYCMGGEFFRALQTR-----       |     |     | K              |
| RIM15_Scer/1-269   | -----                                          |     | NKDNLFVMEYLPGGDLATLIK-----          |     |     |                |
| IPL1_Scer/1-252    | -----                                          |     | DEKRVYLLMEYLVNGEMYKLLRL-----        |     |     |                |
| PKH2_Scer/1-265    | -----                                          |     | DESSLYFLLEYAPNGDFLSLMKK-----        |     |     |                |
| KCC4_Scer/1-265    | -----                                          |     | TNNNLYLILEYAEKGELFNLLVD-----        |     |     |                |
| GIN4_Scer/1-271    | -----                                          |     | TNTDLYLVLEYAEKGELFNLLVE-----        |     |     |                |
| HSL1_Scer/1-289    | -----                                          |     | NKSELYLVLEYVDGGELFDYLV-----         |     |     |                |
| SNF1_Scer/1-252    | -----                                          |     | SKDEIIMVIEYA-GNELFDYIVQ-----        |     |     |                |
| KIN1_Scer/1-279    | -----                                          |     | LSNHFYMLFEYVSGGQLLDYIIQ-----        |     |     |                |
| KIN4_Scer/1-268    | -----                                          |     | NSKYIGIVLEFVSGGEFYKYIQ-----         |     |     |                |
| YPL141C_Scer/1-273 | -----                                          |     | NSRYIGIVLEYACGGEFYKYIQ-----         |     |     |                |
| CMK1_Scer/1-263    | -----                                          |     | SKDKFYIITQLAKGGELFDRILK-----        |     |     |                |
| CMK2_Scer/1-263    | -----                                          |     | SKDKFYIVTQLATGGELFDRILS-----        |     |     |                |
| RAD53_Scer/1-269   | -----                                          |     | DTESYVMMEFVSGGDLMDVAA-----          |     |     |                |
| RCK2_Scer/1-316    | -----                                          |     | TDSYYYIIQELLTGGEIFGEIVR-----        |     |     |                |
| APG1_Scer/1-302    | -----                                          |     | TSTDFYLIMEYCALGDLTFLK-----          |     |     |                |
| MEK1_Scer/1-284    | -----                                          |     | RNNHLYIFQDLIPGGDLFSYLAG-----        |     |     | DC             |
| YKL171W_Scer/1-283 | -----                                          |     | YAMYCLTERINDGTLYDLVISW-----         |     |     |                |
| CDC5_Scer/1-256    | -----                                          |     | DDSNVYILLEICPNGSLMELLKR-----        |     |     |                |
| PSK2_Scer/1-259    | YYY-----                                       |     | IETPVHGETGSIDLFDVIEF-----           |     |     |                |
| YDL025C_Scer/1-274 | --D-----                                       |     | TYLLVMEYAPY-DFFNLVMS-----           |     |     |                |
| SKY1_Scer/1-312    | P-----                                         |     | NGVHVVMVFEVLGENLLALIKKY-----        |     |     |                |
| YAK1_Scer/1-257    | HKN-----                                       |     | HLCLVFELLSNNLYELLKQ-----            |     |     |                |
| PTK2_Scer/1-305    | TTR-----                                       |     | GWGFIMEL-GVKDLFQLMER-----           |     |     |                |
| PHO85_Scer/1-291   | -----                                          |     | KLTLVFEF-MDNDLKKYMDS-----           |     |     |                |
| CDC28_Scer/1-288   | H-----                                         |     | KLYLVFEF-LDLDLKRMEG-----            |     |     |                |
| SLT2_Scer/1-296    | PDG-----                                       |     | SINGLYLYEEL-MECDMHQI IKSGQ-----     |     |     |                |
| KSS1_Scer/1-301    | ID-----                                        |     | KLNAVYLVEEL-METDLQKVINNQNS-----     |     |     |                |
| FUS3_Scer/1-297    | FE-----                                        |     | NFNEVYIIQEL-MQTDLHRVISTQ-----       |     |     |                |
| HOG1_Scer/1-280    | -----                                          |     | PLEDIYFVTEL-QGTDLHRLLOTR-----       |     |     |                |
| RIM11_Scer/1-284   | ERDSQ-----                                     |     | DEIYLNILEY-MPQSLYQRLRHF-VHQRT-----  |     |     |                |
| MRK1_Scer/1-284    | EKDEE-----                                     |     | DEVYLNVLVDY-MPQSLYQRLRHF-VNLKM----- |     |     |                |
| MCK1_Scer/1-293    | SPQDN-----                                     |     | KVYQHAMEC-LPETLQIEINRY-VTNKL-----   |     |     |                |
| CKA1_Scer/1-324    | S-----                                         |     | KTPALVFEYVDNVD-FRILYP-----          |     |     |                |
| CDC7_Scer/1-272    | -----                                          |     | DQVIAVLPYYPHEE-FRTFYR-----          |     |     |                |
| YCK1_Scer/1-261    | L-----                                         |     | HNILVIDLLGP-SLEDLFDW-----           |     |     |                |
| YCK2_Scer/1-261    | L-----                                         |     | HNILVIDLLGP-SLEDLFDW-----           |     |     |                |
| YCK3_Scer/1-296    | M-----                                         |     | HNILIDLLGP-SLEDLFEW-----            |     |     |                |
| HRR25_Scer/1-259   | E-----                                         |     | YNAMVIDLLGP-SLEDLFNY-----           |     |     |                |
| PRR1_Scer/1-317    | VTSKKPLCDLI IKTPRALPPCDMIMSYCPAGDLLAAVMAR----- |     |                                     |     |     |                |
| MPS1_Scer/1-277    | -----                                          |     | LLYLIMECGDHLSQILNQ-----             |     |     |                |
| GCN2_Scer/1-268    | S-----                                         |     | MLFIQMEYCENRTLYDLIHS-----           |     |     |                |
| KIN3_Scer/1-319    | K-----                                         |     | EVLYLYMEYCSRGDLSQMIKH-----          |     |     | YKQEHKY        |
| PRK1_Scer/1-277    | VNG-----                                       |     | IAYEVFVLMFCERGGLIDFMNT-----         |     |     | RLQNR          |
| ARK1_Scer/1-277    | MLHN-----                                      |     | GSYEVFVLMFCERGGLIDFMNT-----         |     |     | RLQNR          |
| AKL1_Scer/1-285    | RDGV-----                                      |     | QGFEVLLLMELCPNKSLDYMNQ-----         |     |     | RLSTK          |
| VHS1_Scer/1-321    | -----                                          |     | AVCTFIVMDYYPDTLFTSIVDN-----         |     |     |                |
| SKM1_Scer/1-280    | E-----                                         |     | ELWVIMEYMEGGCLTDILDA-----           |     |     | VARSNTG        |
| CLA4_Scer/1-280    | D-----                                         |     | DLWVMEFMEGGSLTDIEN-----             |     |     | SPTNDN         |
| STE20_Scer/1-252   | -----                                          |     | DLWVIMEYMEGGSLTDVVTH-----           |     |     |                |
| CDC15_Scer/1-248   | Y-----                                         |     | ELYILLEYCANGSLRRLISR-----           |     |     |                |
| FMP48_Scer/1-285   | -----                                          |     | YYIMVLEYCECGDLYDFLDIAK-----         |     |     | SQGS           |
| KSP1_Scer/1-260    | -----                                          |     | YIIMEYCSGGDLYEAIKAD-----            |     |     |                |
| CAK1_Scer/1-304    | N-----                                         |     | DLLLLFPFEEMLNLYEFMQM-----           |     |     | HYKRDRRKKNPYYD |



Table S4, continued

|                    | 241                | 250    | 260           | 270                | 280           | 290   |
|--------------------|--------------------|--------|---------------|--------------------|---------------|-------|
| TOS3_Scer/1-295    | KA--VGP            | -----  | -----         | SILTFQOSRKVVLDVVS  | GLLEYLHSQ     | ----- |
| TPK3_Scer/1-255    | SQ--RFP            | -----  | -----         | NPVAKFYAAEVCLALEY  | LHSHK         | ----- |
| TPK1_Scer/1-255    | SQ--RFP            | -----  | -----         | NPVAKFYAAEVCLALEY  | LHSHK         | ----- |
| TPK2_Scer/1-255    | SQ--RFP            | -----  | -----         | NPVAKFYAAEVILALEY  | LHSHN         | ----- |
| YPK1_Scer/1-256    | EG--RFD            | -----  | -----         | LSRARFYTAELLCALDN  | LHKLD         | ----- |
| YPK2_Scer/1-256    | EG--RFS            | -----  | -----         | LARSRFYIAELLCALDSL | LHKLD         | ----- |
| SCH9_Scer/1-260    | EG--RFS            | -----  | -----         | EDRAKFYIAELVLALEH  | LHDND         | ----- |
| YNR047W_Scer/1-282 | TK--CIC            | -----  | -----         | EDDARFYASEVTAALEY  | LHLLG         | ----- |
| RIM15_Scer/1-269   | MG--YLP            | -----  | -----         | DQWAKQYLTEIVGVNDM  | HQNG          | ----- |
| IPL1_Scer/1-252    | HG--PFN            | -----  | -----         | DILASDYIYQIANALDY  | MHKKN         | ----- |
| PKH2_Scer/1-265    | YG--SLD            | -----  | -----         | ETCARYYAAQIIDAIDY  | LHNSG         | ----- |
| KCC4_Scer/1-265    | HG--PLP            | -----  | -----         | EREAINCFRQIIIGISY  | CHALG         | ----- |
| GIN4_Scer/1-271    | RG--PLP            | -----  | -----         | EHEAIRFFRQIIIGVSY  | CHALG         | ----- |
| HSL1_Scer/1-289    | KG--KLP            | -----  | -----         | EREAIHYFKQIVEGVSY  | CHSFN         | ----- |
| SNF1_Scer/1-252    | RD--KMS            | -----  | -----         | EQEARKFFQQIISAVEY  | CHRHK         | ----- |
| KIN1_Scer/1-279    | HG--SIR            | -----  | -----         | EHQARKFARGIASALIY  | LHANN         | ----- |
| KIN4_Scer/1-268    | KR--RLK            | -----  | -----         | ESSACRLFAQLISGVNY  | MHYKG         | ----- |
| YPL141C_Scer/1-273 | KR--RLK            | -----  | -----         | EMNACRLFSQLISGVHY  | IHSGK         | ----- |
| CMK1_Scer/1-263    | KG--KFT            | -----  | -----         | EEDAVRILVEILSAVKY  | MHSQN         | ----- |
| CMK2_Scer/1-263    | RG--KFT            | -----  | -----         | EVDAVEIVQILGAVEYM  | HSKN          | ----- |
| RAD53_Scer/1-269   | HG--AVG            | -----  | -----         | EDAGREISRQILTAIKY  | IHSMG         | ----- |
| RCK2_Scer/1-316    | LT--YFS            | -----  | -----         | EDLSRHVIKQLALAVKH  | MHSLG         | ----- |
| APG1_Scer/1-302    | RK--ELMENHPLLRTVFE | KYPPPS | ENHNLH        | RAFVLSYLOQLASALK   | FRLSKN        | ----- |
| MEK1_Scer/1-284    | LT--SMS            | -----  | -----         | ETESLLIVFQILQALNY  | LHDQD         | ----- |
| YKL171W_Scer/1-283 | DEFKRSKIPFAER      | -----  | -----         | CRLTIFLSLQLLSALKY  | MHSKT         | ----- |
| CDC5_Scer/1-256    | RK--VLT            | -----  | -----         | EPEVRFFTTQICGAIKY  | MHSRR         | ----- |
| PSK2_Scer/1-259    | KK--DMV            | -----  | -----         | EHEAKLVFKQVVASIKH  | LHDQ          | ----- |
| YDL025C_Scer/1-274 | -N--LMT            | -----  | -----         | QDEVNCYFKQLCHGVNY  | LHSMG         | ----- |
| SKY1_Scer/1-312    | EH--RG             | -----  | -----         | IPLIYVKQISKQLLLGL  | DYMHRRCG      | ----- |
| YAK1_Scer/1-257    | NKF--HG            | -----  | -----         | LSIQILIRFTTQILD    | SLCVLKEK      | ----- |
| PTK2_Scer/1-305    | TG--WKN            | -----  | -----         | VPFNEKYCLFKQVAQGI  | KFCHDNG       | ----- |
| PHO85_Scer/1-291   | -----              | RTVGN  | -----         | TPRGLELNLVKYFQWQL  | LQGLAFCHENK   | ----- |
| CDC28_Scer/1-288   | -----              | IPKDQ  | -----         | PLGADIVKFKMMQLCKG  | IAYCHSHR      | ----- |
| SLT2_Scer/1-296    | -----              | -----  | -----         | PLTDAHYQSFTYQILC   | GLKYIHSAD     | ----- |
| KSS1_Scer/1-301    | -----              | -----  | -----         | GFSTLSDDHVQYFTYQ   | ILRALKSIHSAQ  | ----- |
| FUS3_Scer/1-297    | -----              | -----  | -----         | MLSDDHIQYFIYQTL    | RAVKVLHGSN    | ----- |
| HOG1_Scer/1-280    | -----              | -----  | -----         | PLEKQFVQYFLYQILR   | GLKYVHSAG     | ----- |
| RIM11_Scer/1-284   | -----              | -----  | -----         | PMSRLEIKYMFQLFKSL  | NYLHFFAN      | ----- |
| MRK1_Scer/1-284    | -----              | -----  | -----         | QMPRVEIKFYAYQLFK   | KALNYLHNVPR   | ----- |
| MCK1_Scer/1-293    | -----              | -----  | -----         | EMPLKHIRLYTYQIAR   | GMLYLHGLG     | ----- |
| CKA1_Scer/1-324    | -----              | -----  | -----         | KLTDLEIRFYMFELLK   | ALDYCHSMG     | ----- |
| CDC7_Scer/1-272    | -----              | -----  | -----         | DLPIKGIKKYIWELLR   | ALKFVHSHK     | ----- |
| YCK1_Scer/1-261    | CG--R              | -----  | -----         | KFSVKTVVQVAVQMIT   | LIEDLHAHD     | ----- |
| YCK2_Scer/1-261    | CG--R              | -----  | -----         | RFSVKTVVQVAVQMIT   | LIEDLHAHD     | ----- |
| YCK3_Scer/1-296    | CG--R              | -----  | -----         | KFSVKTTCMVAQMIDR   | VRAIHDDH      | ----- |
| HRR25_Scer/1-259   | CH--R              | -----  | -----         | RFSFKTVIMLALQMFC   | RIQYIHGRS     | ----- |
| PRR1_Scer/1-317    | NG--RLE            | -----  | -----         | AWLIQRIFTEVVLA     | VKYLHENS      | ----- |
| MPS1_Scer/1-277    | RSGMPLD            | -----  | -----         | FNFVRFYTKEMLLC     | IKVVHDAG      | ----- |
| GCN2_Scer/1-268    | ENLNQ              | -----  | -----         | RDEYWRLFROILEALSY  | IHSQ          | ----- |
| KIN3_Scer/1-319    | -----              | IP     | -----         | EKIVWGILAQLLTALY   | KCHYGVELPTLTT | ----- |
| PRK1_Scer/1-277    | -----              | LQ     | -----         | ESEILEIMSQTVQGIT   | TAMHALQP      | ----- |
| ARK1_Scer/1-277    | -----              | LH     | -----         | EFEILQIMSQVTQGV    | AAMHALQP      | ----- |
| AKL1_Scer/1-285    | -----              | LT     | -----         | EAEIVKIMYDVALS     | ISQMHYLPV     | ----- |
| VHS1_Scer/1-321    | -R--HFVTN          | -----  | -----         | GLLVKKVFLQIC       | SALNYCHEHG    | ----- |
| SKM1_Scer/1-280    | EHSSPLN            | -----  | -----         | ENQMAYIVKETCQGL    | KFLHKN        | ----- |
| CLA4_Scer/1-280    | SH--SPLT           | -----  | -----         | EPQIAYIVRET        | CQGLKFLHDK    | ----- |
| STE20_Scer/1-252   | CI---LT            | -----  | -----         | EGQIGAVCRETLSGL    | EFLHSHK       | ----- |
| CDC15_Scer/1-248   | --SSTGLS           | -----  | -----         | ENESKTYVTQTL       | LGLKYLHGE     | ----- |
| FMP48_Scer/1-285   | PSSPSLI            | -----  | -----         | QIDMQKIIKQLCSA     | ISFAHSLG      | ----- |
| KSP1_Scer/1-260    | ----AVPKK          | -----  | -----         | TKSITHIITQIMDA     | IEYVHNKG      | ----- |
| CAK1_Scer/1-304    | LL--NPS-IPIV       | -----  | ADPPVQKYTNQLD | VNRYSLSFFRQMV      | EGIAFLHENK    | ----- |

Table S4, continued

|                    | 301                            | 310             | 320             | 330               | 340   | 350    |
|--------------------|--------------------------------|-----------------|-----------------|-------------------|-------|--------|
| TOS3_Scer/1-295    | -----                          | ITHRDLKPSNLLI   | -----           | SSNG              | ----- | -----  |
| TPK3_Scer/1-255    | -----                          | IIYRDLKPENILL   | -----           | DKNG              | ----- | -----  |
| TPK1_Scer/1-255    | -----                          | IIYRDLKPENILL   | -----           | DKNG              | ----- | -----  |
| TPK2_Scer/1-255    | -----                          | IIYRDLKPENILL   | -----           | DRNG              | ----- | -----  |
| YPK1_Scer/1-256    | -----                          | VVYRDLKPENILL   | -----           | DYQG              | ----- | -----  |
| YPK2_Scer/1-256    | -----                          | VIYRDLKPENILL   | -----           | DYQG              | ----- | -----  |
| SCH9_Scer/1-260    | -----                          | IVYRDLKPENILL   | -----           | DANG              | ----- | -----  |
| YNR047W_Scer/1-282 | -----                          | FIYRDLKPENILL   | -----           | HQSG              | ----- | -----  |
| RIM15_Scer/1-269   | -----                          | IIHHDLPENILL    | -----           | DNAG              | ----- | -----  |
| IPL1_Scer/1-252    | -----                          | IIHRDLKPENILL   | -----           | GFNN              | ----- | -----  |
| PKH2_Scer/1-265    | -----                          | IIHRDLKPENILL   | -----           | DGEM              | ----- | -----  |
| KCC4_Scer/1-265    | -----                          | IVHRDLKPENILL   | -----           | DSFY              | ----- | -----  |
| GIN4_Scer/1-271    | -----                          | IVHRDLKPENILL   | -----           | DKHY              | ----- | -----  |
| HSL1_Scer/1-289    | -----                          | ICHRDLKPENILL   | -----           | DKKN              | ----- | -----  |
| SNF1_Scer/1-252    | -----                          | IVHRDLKPENILL   | -----           | DEHL              | ----- | -----  |
| KIN1_Scer/1-279    | -----                          | IVHRDLKIENIMI   | -----           | SDSS              | ----- | -----  |
| KIN4_Scer/1-268    | -----                          | LVHRDLKLENLLI   | -----           | DKHE              | ----- | -----  |
| YPL141C_Scer/1-273 | -----                          | LVHRDLKLENLLI   | -----           | DKNE              | ----- | -----  |
| CMK1_Scer/1-263    | -----                          | IVHRDLKPENLLY   | -----           | IDKSDES           | ----- | -----  |
| CMK2_Scer/1-263    | -----                          | VVHRDLKPENVLY   | -----           | VDKSENS           | ----- | -----  |
| RAD53_Scer/1-269   | -----                          | ISHRDLKPDNILL   | -----           | EQDDP             | ----- | -----  |
| RCK2_Scer/1-316    | -----                          | VVHRDLKPENLLFEP | IEFTRSIKPKLRKSD | -----             | ----- | -----  |
| APG1_Scer/1-302    | -----                          | LVHRDLKPQNLLI   | -----           | STPLIGY           | ----- | -----  |
| MEK1_Scer/1-284    | -----                          | IVHRDLKLDNILL   | -----           | CTPEP             | ----- | -----  |
| YKL171W_Scer/1-283 | -----                          | IVHGDIKLENCLL   | -----           | QKEGKKS           | ----- | -----  |
| CDC5_Scer/1-256    | -----                          | VIHRDLKLGNIFF   | -----           | DSNY              | ----- | -----  |
| PSK2_Scer/1-259    | -----                          | IVHRDLKDNVIV    | -----           | DSHG              | ----- | -----  |
| YDL025C_Scer/1-274 | -----                          | LAHRDLKLDNCVV   | -----           | TKDG              | ----- | -----  |
| SKY1_Scer/1-312    | -----                          | IIHTDLKPENVLM   | -----           | EENLI             | ----- | -----  |
| YAK1_Scer/1-257    | -----                          | LIHCDLKPENILL   | -----           | CAP               | ----- | -----  |
| PTK2_Scer/1-305    | -----                          | IAHRDLKPENVLI   | -----           | SKEG              | ----- | -----  |
| PHO85_Scer/1-291   | -----                          | ILHRDLKPQNLLI   | -----           | NKR               | ----- | -----  |
| CDC28_Scer/1-288   | -----                          | ILHRDLKPQNLLI   | -----           | NKD               | ----- | -----  |
| SLT2_Scer/1-296    | -----                          | VLHRDLKPGNLLV   | -----           | NAD               | ----- | -----  |
| KSS1_Scer/1-301    | -----                          | VIHRDLKPSNLLI   | -----           | NSN               | ----- | -----  |
| FUS3_Scer/1-297    | -----                          | VIHRDLKPSNLLI   | -----           | NSN               | ----- | -----  |
| HOG1_Scer/1-280    | -----                          | VIHRDLKPSNILL   | -----           | NEN               | ----- | -----  |
| RIM11_Scer/1-284   | -----                          | VCHRDIKPQNLLV   | -----           | DPET              | ----- | -----  |
| MRK1_Scer/1-284    | -----                          | ICHRDIKPQNLLV   | -----           | DPTT              | ----- | -----  |
| MCK1_Scer/1-293    | -----                          | VCHRDIKPSNVLV   | -----           | DPET              | ----- | -----  |
| CKA1_Scer/1-324    | -----                          | IMHRDVKPHNVM    | -----           | DHKN              | ----- | -----  |
| CDC7_Scer/1-272    | -----                          | IIHRDLKPTNPLF   | -----           | NLEL              | ----- | -----  |
| YCK1_Scer/1-261    | -----                          | LIYRDLKPDNFLI   | -----           | GRPG              | ----- | -----  |
| YCK2_Scer/1-261    | -----                          | LIYRDLKPDNFLI   | -----           | GRPG              | ----- | -----  |
| YCK3_Scer/1-296    | -----                          | LIYRDLKPDNFLI   | -----           | SQYQRISPEGKVIKSCA | ----- | -----  |
| HRR25_Scer/1-259   | -----                          | FIHRDLKPDNFLM   | -----           | GVGR              | ----- | -----  |
| PRR1_Scer/1-317    | -----                          | IIHRDLKLENILL   | -----           | KYSFDDIN          | ----- | -----  |
| MPS1_Scer/1-277    | -----                          | IVHSDLKPANFVL   | -----           | VKG               | ----- | -----  |
| GCN2_Scer/1-268    | -----                          | IIHRDLKPMNIFI   | -----           | DESR              | ----- | -----  |
| KIN3_Scer/1-319    | IYDRMKPPVKGNIVHRDLKPGNIFLSYDDS | -D              | -----           | YNINEQVDGHEE      | ----- | VNSNYY |
| PRK1_Scer/1-277    | -----                          | PLIHRDLKIENVLI  | -----           | SHDG              | ----- | -----  |
| ARK1_Scer/1-277    | -----                          | PLIHRDLKIENVLI  | -----           | SANN              | ----- | -----  |
| AKL1_Scer/1-285    | -----                          | SLIHRDLKIENVLI  | -----           | DAKN              | ----- | -----  |
| VHS1_Scer/1-321    | -----                          | IYHCDIKPENLLL   | -----           | DTED              | ----- | -----  |
| SKM1_Scer/1-280    | -----                          | KIIHRDLKSDNILL  | -----           | NSQG              | ----- | -----  |
| CLA4_Scer/1-280    | -----                          | HIHRDLKSDNVLL   | -----           | DTRA              | ----- | -----  |
| STE20_Scer/1-252   | -----                          | GVLHRDLKSDNILL  | -----           | SMEG              | ----- | -----  |
| CDC15_Scer/1-248   | -----                          | GVIHRDLKAAANILL | -----           | SADN              | ----- | -----  |
| FMP48_Scer/1-285   | -----                          | IAHRDLKPENILL   | -----           | TING              | ----- | -----  |
| KSP1_Scer/1-260    | -----                          | IYHRDLKPENILL   | -----           | SGIDW             | ----- | -----  |
| CAK1_Scer/1-304    | -----                          | IIHRDLKPQNIML   | -----           | TNNTSTVS          | ----- | -----  |



Table S4, continued

|                    | 421                       | 430         | 440    | 450     | 460       | 470                    |
|--------------------|---------------------------|-------------|--------|---------|-----------|------------------------|
| TOS3_Scer/1-295    | QLLKSRLALGTPAFFAPELCS     | TEKEYS      | -----  | -----   | -----     | -----                  |
| TPK3_Scer/1-255    | -DVTYTLCGTPDYIAPEVVST     | -----       | -----  | -----   | -----     | -----                  |
| TPK1_Scer/1-255    | -DVTYTLCGTPDYIAPEVVST     | -----       | -----  | -----   | -----     | -----                  |
| TPK2_Scer/1-255    | -TVTWTLCGTPDYIAPEVITT     | -----       | -----  | -----   | -----     | -----                  |
| YPK1_Scer/1-256    | DDKTDTFCGTPEYLAPPELLG     | -----       | -----  | -----   | -----     | -----                  |
| YPK2_Scer/1-256    | NDKTDTFCGTPEYLAPPELLG     | -----       | -----  | -----   | -----     | -----                  |
| SCH9_Scer/1-260    | --RTNTFCGTTEYLAPELLDE     | -----       | -----  | -----   | -----     | -----                  |
| YNR047W_Scer/1-282 | GFRTNFSVFGTEEYIAPEVIRG    | -----       | -----  | -----   | -----     | -----                  |
| RIM15_Scer/1-269   | KKQNKKFFGTPDYLAPEITGK     | -----       | -----  | -----   | -----     | -----                  |
| IPL1_Scer/1-252    | ENRRRTVCGTIDYLSPEMVES     | -----       | -----  | -----   | -----     | -----                  |
| PKH2_Scer/1-265    | STRSKSFVGTAEYVSPPELLND    | -----       | -----  | -----   | -----     | -----                  |
| KCC4_Scer/1-265    | ADLLETSCGSPHYAAPEIVSG     | -----       | -----  | -----   | -----     | -----                  |
| GIN4_Scer/1-271    | GKLETSCGSPHYAAPEIVSG      | -----       | -----  | -----   | -----     | -----                  |
| HSL1_Scer/1-289    | NKLLKTSCGSPHYASPEIVMG     | -----       | -----  | -----   | -----     | -----                  |
| SNF1_Scer/1-252    | GNFLKTSCGSPNYAAPEIVSG     | -----       | -----  | -----   | -----     | -----                  |
| KIN1_Scer/1-279    | RKQLHTFCGSLYFAAPELLKA     | -----       | -----  | -----   | -----     | -----                  |
| KIN4_Scer/1-268    | NELMKTSCGSPCYAAPELVVST    | -----       | -----  | -----   | -----     | -----                  |
| YPL141C_Scer/1-273 | NELMKTSCGSPCYAAPELVISA    | -----       | -----  | -----   | -----     | -----                  |
| CMK1_Scer/1-263    | EELLYKPAGSLGYVAPEVLT      | -----       | -----  | -----   | -----     | -----                  |
| CMK2_Scer/1-263    | EDLIYKAAGSLGYVAPEVLT      | -----       | -----  | -----   | -----     | -----                  |
| RAD53_Scer/1-269   | GSFMKTFCGTLAYVAPEVIRGK    | DTSVSPDEYEE | ----   | ----    | ----      | ----                   |
| RCK2_Scer/1-316    | --KNTKTPCGTVGYTAPEVVKD    | -----       | -----  | -----   | -----     | -----                  |
| APG1_Scer/1-302    | TSLAETLCGSPLYMAPEILN      | -----       | -----  | -----   | -----     | -----                  |
| MEK1_Scer/1-284    | KERMHTVVGTPPEYCAPEVGF     | FRANRKA     | YQSF   | SRAATLE | QRGYDSK   | CDLWSLGVITHIMLT        |
| YKL171W_Scer/1-283 | EPEPSKYIGSLPYASPELLDFP    | -----       | -----  | -----   | -----     | -----                  |
| CDC5_Scer/1-256    | SERKYTCGTPNYIAPEVLMGK     | -----       | -----  | -----   | -----     | -----                  |
| PSK2_Scer/1-259    | --PFDVFGTMDYAAPEVLGSS     | -----       | -----  | -----   | -----     | -----                  |
| YDL025C_Scer/1-274 | IVKSHGIVGSDPYLAPELLKQT    | -----       | -----  | -----   | -----     | -----                  |
| SKY1_Scer/1-312    | --EHYTNSIQTREYRSPEVLLG    | -----       | -----  | -----   | -----     | -----                  |
| YAK1_Scer/1-257    | --RTVYTYIQSRFYRAPEIILG    | -----       | -----  | -----   | -----     | -----                  |
| PTK2_Scer/1-305    | VKTCQGMIGSPPYTPPEVMY      | FD          | AKKH   | HYPEK   | ----      | ----                   |
| PHO85_Scer/1-291   | VNTFSSEVVTLWYRAPDVLMSG    | -----       | -----  | -----   | -----     | -----                  |
| CDC28_Scer/1-288   | LRAYTHEIVTLWYRAPEVLLGG    | -----       | -----  | -----   | -----     | -----                  |
| SLT2_Scer/1-296    | --FLTEYVATRWRYPEIMLSY     | -----       | -----  | -----   | -----     | -----                  |
| KSS1_Scer/1-301    | VGFMTEYVATRWRYPEIMLTF     | -----       | -----  | -----   | -----     | -----                  |
| FUS3_Scer/1-297    | QSGMTEYVATRWRYPEVMLTS     | -----       | -----  | -----   | -----     | -----                  |
| HOG1_Scer/1-280    | --PQMTGYVSTRYYRAPEIMLTW   | -----       | -----  | -----   | -----     | -----                  |
| RIM11_Scer/1-284   | TEPNVSYICSRYYRAPELIFGA    | -----       | -----  | -----   | -----     | -----                  |
| MRK1_Scer/1-284    | DQPNVSYICSRYYRAPELIFGA    | -----       | -----  | -----   | -----     | -----                  |
| MCK1_Scer/1-293    | NQPSISYICSRFYRAPELIIGC    | -----       | -----  | -----   | -----     | -----                  |
| CKA1_Scer/1-324    | NMEYNVRVASRFFKPELLVDY     | -----       | -----  | -----   | -----     | -----                  |
| CDC7_Scer/1-272    | RIKRANRAGTRGFRAPEVLMKC    | -----       | -----  | -----   | -----     | -----                  |
| YCK1_Scer/1-261    | YREKKSLSGTARYMSINTHLG     | -----       | -----  | -----   | -----     | -----                  |
| YCK2_Scer/1-261    | YREKKSLSGTARYMSINTHLG     | -----       | -----  | -----   | -----     | -----                  |
| YCK3_Scer/1-296    | YREKKSLSGTARYMSINTHFG     | -----       | -----  | -----   | -----     | -----                  |
| HRR25_Scer/1-259   | YRENKSLTGTARYASVNTHLG     | -----       | -----  | -----   | -----     | -----                  |
| PRR1_Scer/1-317    | NEMCTARCGSEDYVSPPEILMGVP  | -----       | -----  | -----   | -----     | -----                  |
| MPS1_Scer/1-277    | NIYRETQIGTPNYMAPEALVAMNY  | TQNS        | ENQHEG | ----    | ----      | ----                   |
| GCN2_Scer/1-268    | SDNLTSAIGTAMYVATEVLDGTG   | -----       | -----  | -----   | -----     | -----                  |
| KIN3_Scer/1-319    | IQFATTYVGTPTYMSPEVLMQD    | -----       | -----  | -----   | -----     | -----                  |
| PRK1_Scer/1-277    | VQHDILTNTTAQYRSPPEMIDLYR  | -----       | -----  | -----   | -----     | -----                  |
| ARK1_Scer/1-277    | VQODILKNTTAQYRSPPEMIDTFR  | -----       | -----  | -----   | -----     | -----                  |
| AKL1_Scer/1-285    | LTQNIYVHTTPQYRSPPEMIDLYR  | -----       | -----  | -----   | -----     | -----                  |
| VHS1_Scer/1-321    | YIKPNVCISSYMPPERISFDGRV   | SSSKSGG     | ----   | ----    | ----      | ----                   |
| SKM1_Scer/1-280    | RSKRATMVGTPYWMapeivN      | -----       | -----  | -----   | -----     | -----                  |
| CLA4_Scer/1-280    | RSKRATMVGTPYWMapeivN      | -----       | -----  | -----   | -----     | -----                  |
| STE20_Scer/1-252   | NLKRRTMVGTPYWMapeivN      | -----       | -----  | -----   | -----     | -----                  |
| CDC15_Scer/1-248   | --SSALTLAGTLNWMapeiLG     | -----       | -----  | -----   | -----     | -----                  |
| FMP48_Scer/1-285   | --KSNDFQIGTDNYRAPETFSGRVS | NSCF        | KKNF   | DRSSAP  | LYNTYQADY | WSLGATIFYLMF           |
| KSP1_Scer/1-260    | --TSMDRNVGSEYMSPELFD      | SNLDIKER    | -----  | -----   | -----     | -----                  |
| CAK1_Scer/1-304    | MDSKVTDISTGIYKAPEVLF      | -----       | -----  | -----   | -----     | -----                  |
|                    |                           |             |        |         |           | VKCYDGGVDVWSLLIIISQWFR |

Table S4, continued

|                    | 481                    | 490                                          | 500 | 510 | 520 | 530         |
|--------------------|------------------------|----------------------------------------------|-----|-----|-----|-------------|
| TOS3_Scer/1-295    | -----GKLPFNANS-----    | -----GLELFDSIINKPLEFFPSY-----                |     |     |     |             |
| TPK3_Scer/1-255    | -----GYTPFYNSN-----    | -----TMKTYENILNAELKFP-----                   |     |     |     |             |
| TPK1_Scer/1-255    | -----GYTPFYDSN-----    | -----TMKTYEKILNAELRFP-----                   |     |     |     |             |
| TPK2_Scer/1-255    | -----GYTPFYDFT-----    | -----PMKTYEKILQKVVYP-----                    |     |     |     |             |
| YPK1_Scer/1-256    | -----GLPPYYDED-----    | -----VPKMYKKILQEPLVFP-----                   |     |     |     |             |
| YPK2_Scer/1-256    | -----GLPPYYDEN-----    | -----VPVMYKKILQQPLLFP-----                   |     |     |     |             |
| SCH9_Scer/1-260    | -----GWSPFFAEN-----    | -----NQKMYQKIAFGKVKFPR-----                  |     |     |     |             |
| YNR047W_Scer/1-282 | -----GTFPFKGDN-----    | -----TNETFTNILKNEVSFPNN-----                 |     |     |     |             |
| RIM15_Scer/1-269   | -----GYPPFHAET-----    | -----PDAVFKKILSGVIQWPEFK-----                |     |     |     |             |
| IPL1_Scer/1-252    | -----GAPPFEEEM-----    | -----KDTTYKRIAALDIKMP-----                   |     |     |     |             |
| PKH2_Scer/1-265    | -----GKPPFKATN-----    | -----EYLTFQKVMKVQYAFTPG-----                 |     |     |     |             |
| KCC4_Scer/1-265    | -----GRLPFDEEN-----    | -----GNVRDLLLKVQKQF-----                     |     |     |     |             |
| GIN4_Scer/1-271    | -----GRLPFDEED-----    | -----GNIRTLILLKVQKGEF-----                   |     |     |     |             |
| HSL1_Scer/1-289    | -----GHLPFNDN-----     | -----NIKLLLLKVQSGKY-----                     |     |     |     |             |
| SNF1_Scer/1-252    | -----RRLPFDEE-----     | -----SIPVLFKNISNGVY-----                     |     |     |     |             |
| KIN1_Scer/1-279    | -----GKVPFDDE-----     | -----NSSVLHEKIKQKQV-----                     |     |     |     |             |
| KIN4_Scer/1-268    | -----GYLPWDDDHEN-----  | -----PTGDDIARLYKYITQTPL-----                 |     |     |     |             |
| YPL141C_Scer/1-273 | -----GYLPWDDDPNN-----  | -----PEGSDIGRLYNYINSTPL-----                 |     |     |     |             |
| CMK1_Scer/1-263    | -----GYSAFRAER-----    | -----VQDFLDECTTGEYYPV-----                   |     |     |     |             |
| CMK2_Scer/1-263    | -----GYSFFIAES-----    | -----VEGFMEECTASRYPV-----                    |     |     |     |             |
| RAD53_Scer/1-269   | -----GHLPFSGST-----    | -----QDQLYKQIGRGSY-----                      |     |     |     |             |
| RCK2_Scer/1-316    | -----GFPFFYDEK-----    | -----IDTLTEKISRGEY-----                      |     |     |     |             |
| APG1_Scer/1-302    | -----GTPPFRASN-----    | -----HLELFKKIKRAN-----                       |     |     |     |             |
| MEK1_Scer/1-284    | -----GISPFYGDG-----    | -----SERSIIQNAKIGKLN-----                    |     |     |     |             |
| YKL171W_Scer/1-283 | -----GKLPFNHEF-----    | -----EPRLRSLIKVGEFDRFS-----                  |     |     |     |             |
| CDC5_Scer/1-256    | -----GKPPFQARD-----    | -----VNTIYERIKCR-----                        |     |     |     |             |
| PSK2_Scer/1-259    | -----KENPYYNI-----     | -----DEILEGELRFDKS-----                      |     |     |     |             |
| YDL025C_Scer/1-274 | -----KRFPWKAP-----     | -----KKSFSNFRFLT-----                        |     |     |     | EEPEDED---  |
| SKY1_Scer/1-312    | -----GDFLFEPDEGHS----- | -----YTKDDDHIAQIIELLGELPSYLLRNGKYTR-----     |     |     |     |             |
| YAK1_Scer/1-257    | -----GIPIFPGAS-----    | -----EYNQLTRIIDTLGYP-----                    |     |     |     |             |
| PTK2_Scer/1-305    | -----NIIPFIDS-----     | -----CNTDARFREFEVSYDNFINHQNP-----            |     |     |     | HFRDKGCHK   |
| PHO85_Scer/1-291   | -----GKPLFPGTN-----    | -----DEEQKLIIFDIMGTP-----                    |     |     |     | NESLWPSVTK  |
| CDC28_Scer/1-288   | -----RKPIFSGDS-----    | -----EIDQIFKIFRVLGTP-----                    |     |     |     | NEAIWPDIVY  |
| SLT2_Scer/1-296    | -----GKPIFKGKD-----    | -----YVNQLNQILOVLGTP-----                    |     |     |     | PDETLLRIGSK |
| KSS1_Scer/1-301    | -----GKPLFPGRD-----    | -----YHHQLWLILEVLGTP-----                    |     |     |     | SFEDFNQIKSK |
| FUS3_Scer/1-297    | -----RRPIFPGRD-----    | -----YRHQLLLIFGIIGTPHSDNDLRCIESP-----        |     |     |     |             |
| HOG1_Scer/1-280    | -----GKPLFPGKD-----    | -----HVHQFSIITDLLGSP-----                    |     |     |     | PKDVINTICSE |
| RIM11_Scer/1-284   | -----GQPMFPGES-----    | -----GIDQLVEI IKILGTP-----                   |     |     |     | SKQEICSMNPN |
| MRK1_Scer/1-284    | -----GKPLFSGES-----    | -----GIDQLVEI IKIMGIP-----                   |     |     |     | TKDEISGMNPN |
| MCK1_Scer/1-293    | -----GKAIFQOQE-----    | -----PLLQREIAKLLGPP-----                     |     |     |     | DKRFIFFSNPA |
| CKA1_Scer/1-324    | -----KREPFHGT-----     | -----NTDQLVKIVKVLGTSDFEKYLLKYEIT-----        |     |     |     |             |
| CDC7_Scer/1-272    | -----RRFPMFQSLD-----   | -----DADSLLELCTIFGWKELRKAALHGLGFEASGLID----- |     |     |     |             |
| YCK1_Scer/1-261    | -----GHLPWQGLKAP-----  | -----NNKQKYEKIG-----                         |     |     |     |             |
| YCK2_Scer/1-261    | -----GQLPWQGLKAP-----  | -----NNKQKYEKIG-----                         |     |     |     |             |
| YCK3_Scer/1-296    | -----GSLPWQGLKAP-----  | -----NNKLYEKIG-----                          |     |     |     |             |
| HRR25_Scer/1-259   | -----GSLPWQGLKAT-----  | -----TKKQYDRIM-----                          |     |     |     |             |
| PRR1_Scer/1-317    | -----DRLPFDPPPNAS----- | -----ARQSRATSHRIARFDWR-----                  |     |     |     |             |
| MPS1_Scer/1-277    | -----GKPPYGSFQ-----    | -----GQNRLLAIMNPDVKIPFPEHTS-----             |     |     |     |             |
| GCN2_Scer/1-268    | -----PFST-----         | -----GMERNILKRLRSVSI-----                    |     |     |     |             |
| KIN3_Scer/1-319    | -----LHPPFOAKN-----    | -----YLELQTKIKNG-----                        |     |     |     |             |
| PRK1_Scer/1-277    | -----YTPPFEKS-----     | -----GEAGILHARYQYPSFP-----                   |     |     |     |             |
| ARK1_Scer/1-277    | -----YTPPFEKG-----     | -----GDLAILSGKFEPFLYP-----                   |     |     |     |             |
| AKL1_Scer/1-285    | -----FTTPFEMT-----     | -----GQFAILHSHKYEFVFN-----                   |     |     |     |             |
| VHS1_Scer/1-321    | -----IRNPWLKA-----     | -----DKTEDNTYYYFTKDPN-----                   |     |     |     |             |
| SKM1_Scer/1-280    | -----GEPPYLN-----      | -----EDPLKALYLIANN-----                      |     |     |     |             |
| CLA4_Scer/1-280    | -----GEPPYLN-----      | -----EDPLKALYLIATN-----                      |     |     |     |             |
| STE20_Scer/1-252   | -----GEPPYLN-----      | -----ETPLRALYLIATN-----                      |     |     |     |             |
| CDC15_Scer/1-248   | -----KNPPYHN-----      | -----LTDANIYYAVEN-----                       |     |     |     |             |
| FMP48_Scer/1-285   | -----GDCLFRVSKSK-----  | -----KVQHLKNFDEFEKD-----                     |     |     |     |             |
| KSP1_Scer/1-260    | -----HKNPFSIAN-----    | -----QSDKSFCYFAANREALFD-----                 |     |     |     |             |
| CAK1_Scer/1-304    | ETSRMGHVPAMIDDGS-----  | -----DDMNSDGSDFRLICS-----                    |     |     |     |             |

Table S4, continued

|                    | 541    | 550      | 560          | 570            | 580       | 590                         |
|--------------------|--------|----------|--------------|----------------|-----------|-----------------------------|
| TOS3_Scer/1-295    | -----  |          | EEMLNGATSGIT | -----          | MEEYTD    | AKDLLKLLQKDPDKR             |
| TPK3_Scer/1-255    | -----  |          |              | -----          | PPFHPDAQ  | DLLKLLITRDLSER              |
| TPK1_Scer/1-255    | -----  |          |              | -----          | PPFNEDVK  | DLLSRLITRDLSQL              |
| TPK2_Scer/1-255    | -----  |          |              | -----          | PYFHPDVV  | DLLSKLITADLTRR              |
| YPK1_Scer/1-256    | -----  |          |              | -----          | DGFDRDAK  | DLLIGLLSRDPTRR              |
| YPK2_Scer/1-256    | -----  |          |              | -----          | DGFDPAAK  | DLLIGLLSRDPSRR              |
| SCH9_Scer/1-260    | -----  |          |              | -----          | DVLSQEGRS | FVKGLLRNPKHR                |
| YNR047W_Scer/1-282 | -----  |          |              | -----          | NEISRTCK  | DLIKLLTKNESKR               |
| RIM15_Scer/1-269   | -----  |          |              | -----          | NEEEEREFL | TPEAKDLIEKLLVDPKR           |
| IPL1_Scer/1-252    | -----  |          |              | -----          | SNISQDAQ  | DILKLLKYDPKDR               |
| PKH2_Scer/1-265    | -----  |          |              | -----          | FPLIIRDV  | KKILVKNLDRR                 |
| KCC4_Scer/1-265    | -----  |          |              | -----          | EMPNDTEI  | SRDAQDLIGKILVDPQR           |
| GIN4_Scer/1-271    | -----  |          |              | -----          | EMPSDDEI  | SREAQDLIRKILTVDPERR         |
| HSL1_Scer/1-289    | -----  |          |              | -----          | QMPSN--   | LSSEARDLISKILVIDPEKR        |
| SNF1_Scer/1-252    | -----  |          |              | -----          | TLPKF--   | LSPGAAGLIKRMILVPLNR         |
| KIN1_Scer/1-279    | -----  |          |              | -----          | EYPQH--   | LSIEVISLLSKMLVDPKRR         |
| KIN4_Scer/1-268    | -----  |          |              | -----          | KFPEY--   | ITPIPRDLLRRILVNPRRR         |
| YPL141C_Scer/1-273 | -----  |          |              | -----          | KFPDY--   | ILPIPRDLLRRMLVSDPKKR        |
| CMK1_Scer/1-263    | -----  |          |              | -----          | KFHRPYW   | SDSVSNKAKQFILKALNLDPSKR     |
| CMK2_Scer/1-263    | -----  |          |              | -----          | TFHMPYW   | DNISIDVKRFILKALRLNPADR      |
| RAD53_Scer/1-269   | -----  |          |              | -----          | HEGPLKDF  | RISEEARDFIDSLQLQVDPNRR      |
| RCK2_Scer/1-316    | -----  |          |              | -----          | TFLKPWW   | DEISAGAKNAVAKLLELEPSKR      |
| APG1_Scer/1-302    | -----  |          |              | -----          | VITFPSYC  | NIEPELKELICSLTTFDPAQR       |
| MEK1_Scer/1-284    | -----  |          |              | -----          | FKLQWDI   | VSDNAKSFVKDLLQTDVVKR        |
| YKL171W_Scer/1-283 | -----  |          |              | -----          | LAQVCKF   | DRKKNEGTTIGQLYDVTVIGCLTIDLK |
| CDC5_Scer/1-256    | -----  |          |              | -----          | DFSFP     | PRDKPISDEGKILIRDILSLDPIER   |
| PSK2_Scer/1-259    | -----  |          |              | -----          | EHVSEEC   | ISLIKRILTREVDKR             |
| YDL025C_Scer/1-274 | -----  | DIVRG    | -----        | -----          | PNKILR    | LRLPRHSRTIIGRMLALEPKQR      |
| SKY1_Scer/1-312    | -----  | TFFNSRGL | LRNISK       | LKFWPLEDVLTE   | -----     | KYKFSKDEAKEISDFLSPMLQLDPRKR |
| YAK1_Scer/1-257    | -----  |          |              | -----          | PSWMIR    | -----                       |
| PTK2_Scer/1-305    | PGPGSE | -----    |              | -----          | YSLARN    | FKNATDTRIARWLADPNPATR       |
| PHO85_Scer/1-291   | -----  | LPKYNPNI | ---QOR---    | PPRDLRQV       | LQPHT     | ---KEPLDGNLMDFLHGLLQLNPDMR  |
| CDC28_Scer/1-288   | -----  | LPDFKPSF | ---PQW---    | RRKDL          | SQVVP     | -----SLDPRGIDLLDKLLAYDPINR  |
| SLT2_Scer/1-296    | -----  | NVQDY    | ---IHQLGF    | IPKVPFVNLYPN   | -----     | ANSQALDLEQLAFDPQKR          |
| KSS1_Scer/1-301    | -----  | RAKEY    | ---IANLPMR   | PPLPWETVWSKT   | -----     | DLNPDMLDLLDKMLQFNPDKR       |
| FUS3_Scer/1-297    | -----  | RAREY    | ---IKSLPMY   | PAAPLEKMFPR    | -----     | VNPKGIDLLQRMVLPDAKR         |
| HOG1_Scer/1-280    | -----  | NTLKF    | ---VTSLPHR   | DIPIPFSERFKT   | -----     | VEPDAVDLLEKMLVDPKRR         |
| RIM11_Scer/1-284   | -----  | YMEH     | ---KFPQIK    | PIPLSRVFKK     | -----     | EDDQTVFELADVLLKYDPLER       |
| MRK1_Scer/1-284    | -----  | YEDH     | ---VFPNIK    | ITLAEIFKA      | -----     | EDPDTLDDLTKTKLHPCER         |
| MCK1_Scer/1-293    | -----  | YDGPLF   | SKPLFSGSSQ   | RFEKYFGH       | -----     | SGPDGIDLLMKILVYEPQQR        |
| CKA1_Scer/1-324    | -----  | LPREFYD  | ---MDQYIR    | KPWHRFIN       | ---DGNKHL | SGNDEIIDLDNLLRYDHQER        |
| CDC7_Scer/1-272    | -----  | KPNGYSNG | ---LKEFVY    | DLLNKECTIGTFPE | ---       | HYWCQVLEQCFEMDPQKR          |
| YCK1_Scer/1-261    | -----  |          |              | -----          | EKKRSTNVY | -----DLAQG                  |
| YCK2_Scer/1-261    | -----  |          |              | -----          | EKKRLTNVY | -----DLAQG                  |
| YCK3_Scer/1-296    | -----  |          |              | -----          | MTKQKLNPD | -----DLLLLNNAIPYQFATYLKYA   |
| HRR25_Scer/1-259   | -----  |          |              | -----          | EKKLNV    | SVE-----TLC                 |
| PRR1_Scer/1-317    | -----  |          |              | -----          | WYRLSDY   | KTNVGVKQIVENTLTRK           |
| MPS1_Scer/1-277    | -----  |          |              | -----          | NNEKIPK   | SAIELMKACLYRNPDKR           |
| GCN2_Scer/1-268    | -----  |          |              | -----          | FPPDFDDN  | -----KMKVEKKIIRLLIDHDPNKR   |
| KIN3_Scer/1-319    | -----  |          |              | -----          | KCDTVPEY  | -----YSRGLNAIHSMDIVNLRTR    |
| PRK1_Scer/1-277    | -----  |          |              | -----          | QYSDRL    | KNLIRLMLMEAPSQR             |
| ARK1_Scer/1-277    | -----  |          |              | -----          | NYSEQL    | KGLIRDILVQDPRHR             |
| AKL1_Scer/1-285    | -----  |          |              | -----          | KYSSKL    | INLIIIMLAENPNLR             |
| VHS1_Scer/1-321    | -----  |          |              | -----          | ILKQIL    | PLSDDFYSLLSKILQVNPKNR       |
| SKM1_Scer/1-280    | -----  |          |              | -----          | GSPKLRHPE | -----SVSKQTKQFLDACLVNVESR   |
| CLA4_Scer/1-280    | -----  |          |              | -----          | GTPKLRHPE | -----SLSLEIKRFLSVCLQVDVRYR  |
| STE20_Scer/1-252   | -----  |          |              | -----          | GTPKLRHPE | -----NLSSSLKKFLDWCLCPEPEDR  |
| CDC15_Scer/1-248   | -----  |          |              | -----          | DTYPPS    | -----SFSEPLKDFLSKCFVKNMYKR  |
| FMP48_Scer/1-285   | -----  |          |              | -----          | PFAFIYR   | KYVVPRLSCGYNDEEDLHVSILQHTR  |
| KSP1_Scer/1-260    | -----  |          |              | -----          | VFSTMAY   | DFQVLRYSLTIDPANRD           |
| CAK1_Scer/1-304    | -----  |          |              | -----          | IFEKVKQ   | KFINCILGMVSPSPNER           |

Table S4, continued

|                    | 601                    | 610                | 620 |
|--------------------|------------------------|--------------------|-----|
| TOS3_Scer/1-295    | IK-----                | LADIKVHPFM-----    |     |
| TPK3_Scer/1-255    | LGNLQNGSEDVKNHPWF----- |                    |     |
| TPK1_Scer/1-255    | LGNLQNGTEDVKNHPWF----- |                    |     |
| TPK2_Scer/1-255    | IGNLQSGSRDIKAHPWF----- |                    |     |
| YPK1_Scer/1-256    | LG--YNGADEIRNHPFF----- |                    |     |
| YPK2_Scer/1-256    | LG--VNGTDEIRNHPFF----- |                    |     |
| SCH9_Scer/1-260    | LGA-IDDGRELRAHPFF----- |                    |     |
| YNR047W_Scer/1-282 | LGC-KMGAADVKKHPFF----- |                    |     |
| RIM15_Scer/1-269   | LG--AKGIQEIKDHPYF----- |                    |     |
| IPL1_Scer/1-252    | MR-----                | LGDKMHPWI-----     |     |
| PKH2_Scer/1-265    | LT-----                | ISQIKEHHFF-----    |     |
| KCC4_Scer/1-265    | IK-----                | IRDILSHPLL-----    |     |
| GIN4_Scer/1-271    | IK-----                | TRDILKHPLL-----    |     |
| HSL1_Scer/1-289    | IT-----                | TOEILKHPLI-----    |     |
| SNF1_Scer/1-252    | IS-----                | IHEIMQDDWF-----    |     |
| KIN1_Scer/1-279    | AT-----                | LKQVVEHHWM-----    |     |
| KIN4_Scer/1-268    | IN-----                | LQTIKRHVWL-----    |     |
| YPL141C_Scer/1-273 | IN-----                | LKQIKKHEWL-----    |     |
| CMK1_Scer/1-263    | PT-----                | AAELLEDPWI-----    |     |
| CMK2_Scer/1-263    | PT-----                | ATELLDDPWI-----    |     |
| RAD53_Scer/1-269   | ST-----                | AAKALNHPWI-----    |     |
| RCK2_Scer/1-316    | YD-----                | IDQFLDDPWL-----    |     |
| APG1_Scer/1-302    | IG-----                | FEEFFANKVV-----    |     |
| MEK1_Scer/1-284    | LN-----                | SKQGLKHIWI-----    |     |
| YKL171W_Scer/1-283 | RWK-----               | LKRIEEVL-----      |     |
| CDC5_Scer/1-256    | PS-----                | LTEIMDYVWF-----    |     |
| PSK2_Scer/1-259    | PT-----                | IDEIYEDKWL-----    |     |
| YDL025C_Scer/1-274 | VL-----                | MNDVVKDDWL-----    |     |
| SKY1_Scer/1-312    | AD-----                | AGGLVNHPWL-----    |     |
| YAK1_Scer/1-257    | WT-----                | PQQAMLHPFI-----    |     |
| PTK2_Scer/1-305    | YT-----                | MDDLFDNPPFF-----   |     |
| PHO85_Scer/1-291   | LS-----                | AKQALHHPWF-----    |     |
| CDC28_Scer/1-288   | IS-----                | ARRAAIHPYF-----    |     |
| SLT2_Scer/1-296    | IT-----                | VDEALEHPYL-----    |     |
| KSS1_Scer/1-301    | IS-----                | AAEALRHPYL-----    |     |
| FUS3_Scer/1-297    | IT-----                | AKEALEHPYL-----    |     |
| HOG1_Scer/1-280    | IT-----                | AADALAHPYS-----    |     |
| RIM11_Scer/1-284   | FN-----                | ALQCLCSPYF-----    |     |
| MRK1_Scer/1-284    | LV-----                | PLQCLLSSYF-----    |     |
| MCK1_Scer/1-293    | LS-----                | PRRILAHQFF-----    |     |
| CKA1_Scer/1-324    | LT-----                | AKEAMGHPWF-----    |     |
| CDC7_Scer/1-272    | SS-----                | AEDLLKTPFF-----    |     |
| YCK1_Scer/1-261    | RS-----                | LSFEPCPDYEGYRLLLL  |     |
| YCK2_Scer/1-261    | RN-----                | LSFEETPDYEGYRMLLL  |     |
| YCK3_Scer/1-296    | RS-----                | LKFDEDPDYD----YLI  |     |
| HRR25_Scer/1-259   | KN-----                | LKFDEKPDYLFARLFK   |     |
| PRR1_Scer/1-317    | NQR--                  | WSINEIYESPFV-----  |     |
| MPS1_Scer/1-277    | WT-----                | VDKVLSSTFL-----    |     |
| GCN2_Scer/1-268    | PG-----                | ARTLLNSGWL-----    |     |
| KIN3_Scer/1-319    | PS-----                | TFELLQDIQI-----    |     |
| PRK1_Scer/1-277    | PN-----                | ICQVLEEVSR-----    |     |
| ARK1_Scer/1-277    | PN-----                | VYQLLKRISI-----    |     |
| AKL1_Scer/1-285    | PN-----                | IYQVLYHLCE-----    |     |
| VHS1_Scer/1-321    | MS-----                | LQELMKEVSS-----    |     |
| SKM1_Scer/1-280    | AS-----                | VRKLLTFEFL-----    |     |
| CLA4_Scer/1-280    | AS-----                | TEELLHHGFF-----    |     |
| STE20_Scer/1-252   | AS-----                | ATELLHDEYI-----    |     |
| CDC15_Scer/1-248   | PT-----                | ADQLLKHVWI-----    |     |
| FMP48_Scer/1-285   | QY-----                | IWQDLPDIYD-----    |     |
| KSP1_Scer/1-260    | LK--                   | MMRTELQNLSEYT----- |     |
| CAK1_Scer/1-304    | WS-----                | CQILQELE-----      |     |

## Supplemental References

1. D. M. Gelperin, M. A. White, M. L. Wilkinson, Y. Kon, L. A. Kung, K. J. Wise, N. Lopez-Hoyo, L. Jiang, S. Piccirillo, H. Yu, M. Gerstein, M. E. Dumont, E. M. Phizicky, M. Snyder, E. J. Grayhack, Biochemical and genetic analysis of the yeast proteome with a movable ORF collection. *Genes Dev.* **19**, 2816-2826 (2005).
2. R. D. Gietz, R. H. Schiestl, A. R. Willems, R. A. Woods, Studies on the transformation of intact yeast cells by the LiAc/SS-DNA/PEG procedure. *Yeast* **11**, 355-360 (1995).
3. S. Ghaemmaghami, W. K. Huh, K. Bower, R. W. Howson, A. Belle, N. Dephoure, E. K. O'Shea, J. S. Weissman, Global analysis of protein expression in yeast. *Nature* **425**, 737-741 (2003).
4. E. A. Winzeler, D. D. Shoemaker, A. Astromoff, H. Liang, K. Anderson, B. Andre, R. Bangham, R. Benito, J. D. Boeke, H. Bussey, A. M. Chu, C. Connelly, K. Davis, F. Dietrich, S. W. Dow, M. El Bakkoury, F. Foury, S. H. Friend, E. Gentalen, G. Giaever, J. H. Hegemann, T. Jones, M. Laub, H. Liao, N. Liebundguth, D. J. Lockhart, A. Lucau-Danila, M. Lussier, N. M'Rabet, P. Menard, M. Mittmann, C. Pai, C. Rebischung, J. L. Revuelta, L. Riles, C. J. Roberts, P. Ross-MacDonald, B. Scherens, M. Snyder, S. Sookhai-Mahadeo, R. K. Storms, S. Veronneau, M. Voet, G. Volckaert, T. R. Ward, R. Wysocki, G. S. Yen, K. Yu, K. Zimmermann, P. Philippsen, M. Johnston, R. W. Davis, Functional characterization of the *S. cerevisiae* genome by gene deletion and parallel analysis. *Science* **285**, 901-906 (1999).
5. W. P. Voth, Y. W. Jiang, D. J. Stillman, New 'marker swap' plasmids for converting selectable markers on budding yeast gene disruptions and plasmids. *Yeast* **20**, 985-993 (2003).
6. H. Zhu, M. Bilgin, R. Bangham, D. Hall, A. Casamayor, P. Bertone, N. Lan, R. Jansen, S. Bidlingmaier, T. Houfek, T. Mitchell, P. Miller, R. A. Dean, M. Gerstein, M. Snyder, Global analysis of protein activities using proteome chips. *Science* **293**, 2101-2105 (2001).



7. M. Costanzo, O. Schub, B. Andrews, G1 transcription factors are differentially regulated in *Saccharomyces cerevisiae* by the Swi6-binding protein Stb1. *Mol. Cell Biol* **23**, 5064-5077 (2003).
8. Y. J. Sheu, B. Stillman, Cdc7-Dbf4 phosphorylates MCM proteins via a docking site-mediated mechanism to promote S phase progression. *Mol. Cell* **24**, 101-113 (2006).
9. R. P. Bhattacharyya, A. Remenyi, M. C. Good, C. J. Bashor, A. M. Falick, W. A. Lim, The Ste5 scaffold allosterically modulates signaling output of the yeast mating pathway. *Science* **311**, 822-826 (2006).
10. E. Bilsland-Marchesan, J. Arino, H. Saito, P. Sunnerhagen, F. Posas, Rck2 kinase is a substrate for the osmotic stress-activated mitogen-activated protein kinase Hog1. *Mol. Cell. Biol.* **20**, 3887-3895 (2000).
11. I. M. Cheeseman, S. Anderson, M. Jwa, E. M. Green, J. Kang, J. R. Yates, 3rd, C. S. Chan, D. G. Drubin, G. Barnes, Phospho-regulation of kinetochore-microtubule attachments by the Aurora kinase Ipl1p. *Cell* **111**, 163-172 (2002).
12. L. Wan, T. de los Santos, C. Zhang, K. Shokat, N. M. Hollingsworth, Mek1 kinase activity functions downstream of RED1 in the regulation of meiotic double strand break repair in budding yeast. *Mol. Biol. Cell* **15**, 11-23 (2004).
13. R. Sopko, D. Huang, J. C. Smith, D. Figeys, B. J. Andrews, Activation of the Cdc42p GTPase by cyclin-dependent protein kinases in budding yeast. *EMBO J.* **26**, 4487-4500 (2007).
14. J. L. Ma, S. J. Lee, J. K. Duong, D. F. Stern, Activation of the checkpoint kinase Rad53 by the phosphatidylinositol kinase-like kinase Mec1. *J. Biol. Chem.* **281**, 3954-3963 (2006).
15. A. Reinders, N. Burckert, T. Boller, A. Wiemken, C. De Virgilio, *Saccharomyces cerevisiae* cAMP-dependent protein kinase controls entry into stationary phase through the Rim15p protein kinase. *Genes Dev.* **12**, 2943-2955 (1998).
16. D. J. Robbins, E. Zhen, H. Owaki, C. A. Vanderbilt, D. Ebert, T. D. Geppert, M. H. Cobb, Regulation and properties of extracellular signal-regulated protein kinases 1 and 2 in vitro. *J. Biol. Chem.* **268**, 5097-5106 (1993).

17. A. Devault, E. Gueydon, E. Schwob, Interplay between S-cyclin-dependent kinase and Dbf4-dependent kinase in controlling DNA replication through phosphorylation of yeast Mcm4 N-terminal domain. *Mol. Biol. Cell* **19**, 2267-2277 (2008).
18. J. Ptacek, G. Devgan, G. Michaud, H. Zhu, X. Zhu, J. Fasolo, H. Guo, G. Jona, A. Breitskreutz, R. Sopko, R. R. McCartney, M. C. Schmidt, N. Rachidi, S. J. Lee, A. S. Mah, L. Meng, M. J. Stark, D. F. Stern, C. De Virgilio, M. Tyers, B. Andrews, M. Gerstein, B. Schweitzer, P. F. Predki, M. Snyder, Global analysis of protein phosphorylation in yeast. *Nature* **438**, 679-684 (2005).
19. M. Rodriguez, S. S. Li, J. W. Harper, Z. Songyang, An oriented peptide array library (OPAL) strategy to study protein-protein interactions. *J. Biol. Chem.* **279**, 8802-8807 (2004).
20. Z. Songyang, S. Blechner, N. Hoagland, M. F. Hoekstra, H. Piwnicka-Worms, L. C. Cantley, Use of an oriented peptide library to determine the optimal substrates of protein kinases. *Curr. Biol.* **4**, 973-982 (1994).
21. E. F. Johnson, K. D. Stewart, K. W. Woods, V. L. Giranda, Y. Luo, Pharmacological and functional comparison of the polo-like kinase family: insight into inhibitor and substrate specificity. *Biochemistry* **46**, 9551-9563 (2007).
22. Z. Songyang, K. P. Lu, Y. T. Kwon, L. H. Tsai, O. Filhol, C. Cochet, D. A. Brickey, T. R. Soderling, C. Bartleson, D. J. Graves, A. J. DeMaggio, M. F. Hoekstra, J. Blenis, T. Hunter, L. C. Cantley, A structural basis for substrate specificities of protein Ser/Thr kinases: primary sequence preference of casein kinases I and II, NIMA, phosphorylase kinase, calmodulin-dependent kinase II, CDK5, and Erk1. *Mol. Cell. Biol.* **16**, 6486-6493 (1996).
23. U. E. Rennefahrt, S. W. Deacon, S. A. Parker, K. Devarajan, A. Beeser, J. Chernoff, S. Knapp, B. E. Turk, J. R. Peterson, Specificity profiling of Pak kinases allows identification of novel phosphorylation sites. *J. Biol. Chem.* **282**, 15667-15678 (2007).
24. R. R. White, Y. G. Kwon, M. Taing, D. S. Lawrence, A. M. Edelman, Definition of optimal substrate recognition motifs of Ca<sup>2+</sup>-calmodulin-dependent protein kinases IV and II reveals shared and distinctive features. *J. Biol. Chem.* **273**, 3166-3172 (1998).

25. I. A. Manke, A. Nguyen, D. Lim, M. Q. Stewart, A. E. Elia, M. B. Yaffe, MAPKAP kinase-2 is a cell cycle checkpoint kinase that regulates the G2/M transition and S phase progression in response to UV irradiation. *Mol. Cell* **17**, 37-48 (2005).
26. J. A. Gonzalez-Vera, E. Lukovic, B. Imperiali, A rapid method for generation of selective Sox-based chemosensors of Ser/Thr kinases using combinatorial peptide libraries. *Bioorg. Med. Chem. Lett.* **19**, 1258-1260 (2009).
27. J. M. Lizcano, M. Deak, N. Morrice, A. Kieloch, C. J. Hastie, L. Dong, M. Schutkowski, U. Reimer, D. R. Alessi, Molecular basis for the substrate specificity of NIMA-related kinase-6 (NEK6). Evidence that NEK6 does not phosphorylate the hydrophobic motif of ribosomal S6 protein kinase and serum- and glucocorticoid-induced protein kinase in vivo. *J. Biol. Chem.* **277**, 27839-27849 (2002).
28. C. J. Fiol, J. H. Haseman, Y. H. Wang, P. J. Roach, R. W. Roeske, M. Kowalczyk, A. A. DePaoli-Roach, Phosphoserine as a recognition determinant for glycogen synthase kinase-3: phosphorylation of a synthetic peptide based on the G-component of protein phosphatase-1. *Arch. Biochem. Biophys.* **267**, 797-802 (1988).
29. T. Obata, M. B. Yaffe, G. G. LeParc, E. T. Piro, H. Maegawa, A. Kashiwagi, R. Kikkawa, L. C. Cantley, Peptide and protein library screening defines optimal substrate motifs for AKT/PKB. *J. Biol. Chem.* **275**, 36108-36115 (2000).
30. D. M. Gwinn, D. B. Shackelford, D. F. Egan, M. M. Mihaylova, A. Mery, D. S. Vasquez, B. E. Turk, R. J. Shaw, AMPK phosphorylation of raptor mediates a metabolic checkpoint. *Mol. Cell* **30**, 214-226 (2008).
31. M. L. Miller, L. J. Jensen, F. Diella, C. Jorgensen, M. Tinti, L. Li, M. Hsiung, S. A. Parker, J. Bordeaux, T. Sicheritz-Ponten, M. Olhovsky, A. Pasculescu, J. Alexander, S. Knapp, N. Blom, P. Bork, S. Li, G. Cesareni, T. Pawson, B. E. Turk, M. B. Yaffe, S. Brunak, R. Linding, Linear motif atlas for phosphorylation-dependent signaling. *Sci. Signal.* **1**, ra2 (2008).
32. S. Himpel, W. Tegge, R. Frank, S. Leder, H. G. Joost, W. Becker, Specificity determinants of substrate recognition by the protein kinase DYRK1A. *J. Biol. Chem.* **275**, 2431-2438 (2000).
